1 Apparent oxygen half saturation constant for nitrifiers: genus  
2 specific, inherent physiological property, or artefact of colony  
3 morphology?

4 Yingyu Law<sup>1\*</sup>, Artur Matysik<sup>1</sup>, Xueming Chen<sup>2</sup>, Sara Swa Thi<sup>1</sup>, Thi Quynh Ngoc Nguyen<sup>1</sup>,  
5 Guang Lei Qiu<sup>1</sup>, Gayathri Natarajan<sup>1</sup>, Rohan B.H. Williams<sup>3</sup>, Bing-Jie Ni<sup>4</sup>, Thomas William  
6 Seviour<sup>1</sup>, Stefan Wuertz<sup>5\*</sup>

7 <sup>1</sup> Singapore Centre for Environmental Life Sciences Engineering, Nanyang Technological  
8 University, Singapore 637551, Singapore

9 <sup>2</sup> Process and Systems Engineering Center (PROSYS), Department of Chemical and Biochemical  
10 Engineering, Technical University of Denmark, 2800 Kgs Lyngby, Denmark

11 <sup>3</sup> Singapore Centre for Environmental Life Sciences Engineering, National University of  
12 Singapore, Singapore 119077, Singapore

13 <sup>4</sup> Centre for Technology in Water and Wastewater, School of Civil and Environmental  
14 Engineering, University of Technology Sydney, Sydney, NSW 2007, Australia

15 <sup>5</sup> School of Civil and Environmental Engineering, Nanyang Technological University,  
16 Singapore.

17

18

19

20

21 **Abstract**

22 We report that a single *Nitrospira* sublineage I OTU performs nitrite oxidation in several full-scale  
23 domestic wastewater treatment plants (WWTPs) in the tropics (29-31 °C). Contrary to the  
24 prevailing theory for the relationship between nitrite oxidizing bacteria (NOB) and ammonia  
25 oxidizing bacteria (AOB), members of the *Nitrospira* sublineage I OTU had an apparent half  
26 saturation coefficient,  $K_{S(\text{app})}$  lower than that of the full-scale domestic activated sludge cohabitant  
27 AOB ( $0.09 \pm 0.02 \text{ g O}_2 \text{ m}^{-3}$  versus  $0.3 \pm 0.03 \text{ g O}_2 \text{ m}^{-3}$ ). Paradoxically, NOB may thus thrive under  
28 conditions of low oxygen supply. Low dissolved oxygen (DO) conditions could enrich for and  
29 high aeration inhibit the NOB in a long-term lab-scale reactor. The relative abundance of  
30 *Nitrospira* gradually decreased with increasing DO until it was washed out. Nitrification was  
31 sustained even after the DO was lowered subsequently. Based on 3D-fluorescence *in situ*  
32 hybridization (FISH) image analysis, the morphologies of AOB and NOB microcolonies  
33 responded to DO levels in accordance with their apparent oxygen half saturation constant  $K_{S(\text{app})}$ .  
34 When exposed to the same oxygenation level, NOB formed densely packed spherical clusters with  
35 a low surface area-to-volume ratio compared to the *Nitrosomonas*-like AOB clusters, which  
36 maintained a porous and non-spherical morphology. Microcolony morphology is thus a way for  
37 AOB and NOB to regulate oxygen exposure and sustain the mutualistic interaction. However,  
38 short-term high DO exposure can select for AOB and against NOB in full-scale domestic WWTPs  
39 and such population dynamics depend on which specific AOB and NOB species predominate  
40 under given environmental conditions.

41

42

43

## 44 **Introduction**

45 Nitrification activates inert reduced inorganic nitrogen (i.e. ammonium) in the presence of oxygen  
46 to its oxidized form nitrate via nitrite. It is a crucial step in global biogeochemical nitrogen cycling  
47 as well as in biological wastewater treatment (Ward 2011). Ammonia and nitrite oxidation is  
48 catalyzed either in a two-step process by phylogenetically distinct ammonia-oxidizing bacteria  
49 (AOB) or archaea (AOA), and nitrite-oxidizing bacteria (NOB), respectively (Bock and Wagner  
50 2001, Könneke et al 2005) or directly by complete ammonia oxidizers (comammox) (Daims et al  
51 2015, Van Kessel et al 2015). In the two-step process, AOB and NOB are often in close proximity  
52 to one and another in order to finely balance production and consumption of the potentially toxic  
53 nitrite (Gieseke et al 2003, Matsumoto et al 2010, Stein and Arp 1998, Teske et al 1994). NOB are  
54 dependent on AOB for their electron donor, yet they also compete with AOB for oxygen as a  
55 terminal electron acceptor, particularly under oxygen limiting conditions (Juretschko et al 1998b,  
56 Sliemers et al 2005). As a consequence of this tight-knit interaction between AOB and NOB,  
57 changes in the activity and relative abundance of AOB in response to environmental perturbations  
58 could significantly impact the stability of NOB activity (Knapp and Graham 2007). For example,  
59 in wastewater treatment systems, the oxygen competition dynamic between AOB and NOB is  
60 utilized to repress the growth of NOB, enabling stable interaction between AOB and anammox  
61 (anaerobic ammonium oxidizing) bacteria (Lackner et al 2014). Anammox bacteria can convert  
62 ammonium directly to dinitrogen gas using nitrite as an oxidant (Strous et al 1998) and when  
63 coupled with partial ammonium conversion exclusively to nitrite (i.e. partial nitrification) by AOB,  
64 complete nitrogen removal can be achieved with far less energy expenditure (Siegrist et al 2008).

65       Relative half saturation constant ( $K_s$ ) and affinities for oxygen (maximum specific growth  
66 rate per half-saturation constant,  $\mu_{\max}/K_s$ ) can be used to inform and control the competition

67 dynamics between AOB and NOB (Wett et al 2013). While there have been numerous studies that  
68 have investigated the interactions between AOB and NOB, mainly in aquatic systems or biofilm-  
69 and activated sludge-based wastewater treatment systems (Gieseke et al 2003, Jubany et al 2008,  
70 Ke et al 2013, Wiesmann 1994), there is still uncertainty about their relative  $K_s$  for oxygen. It is  
71 generally accepted that AOB have a higher affinity for oxygen (i.e. a lower  $K_s$  for oxygen) than  
72 NOB. Consequently most full-scale partial-nitrification installations treating high-strength  
73 wastewater (total nitrogen > 100 mg N/L), for example, adopt low oxygen set points of less than  
74 0.35 mg O<sub>2</sub>/L to curb NOB activity (Lackner et al 2014). Such observations are based  
75 predominately on studies in high-strength wastewater treatment processes with high ammonia  
76 concentrations (Jubany et al 2008, Wiesmann 1994). However, there are other studies which  
77 suggest that NOB have lower  $K_s$  than AOB based mainly on results from activity tests under  
78 domestic wastewater conditions (total nitrogen between 20 and 70 mg N/L) (Malovanyy et al  
79 2015, Regmi et al 2014, Sliemers et al 2005).

80 The discrepancy observed is likely influenced by phylogenetic variability of AOB and  
81 NOB in different systems. Members of the genus *Nitrosomonas* are among the most frequently  
82 detected AOB in wastewater treatment plants (WWTPs) (Purkhold et al 2000), but different  
83 treatment plants can be dominated by either single or multiple *Nitrosomonas*-like AOB  
84 populations (Daims et al 2001b, Juretschko et al 1998a). In the case of NOB, *Nitrospira* and  
85 *Nitrobacter* have also been reported to co-exist in laboratory-scale reactors and full-scale treatment  
86 plants where nitrite concentrations fluctuate within operational cycles, which allow for niche  
87 differentiation (Coskuner and Curtis 2002, Daims et al 2001b, Kim and Kim 2006). The genus  
88 *Nitrospira* that predominates under domestic wastewater conditions generally has a lower  $K_s$  for  
89 oxygen and nitrite than *Nitrobacter*, which occurs in nitrogen rich systems (Daims et al 2016,

90 Regmi et al 2014). In fact, full genome analysis of *Candidatus Nitrospira defluvii* enriched from a  
91 sewage treatment plant revealed the lack of basic defence mechanisms against oxidative stress  
92 suggesting that their nitrite oxidising activity could potentially be inhibited at high DO  
93 concentration (Lücker et al 2010). In addition to nitrifying community diversity, differences in  
94 the AOB to NOB ratio can also significantly impact their interaction (Yao and Peng 2017). Such  
95 variations in relative abundance and physiological properties suggest that the relative  $K_s$  for  
96 oxygen will depend on the AOB and NOB populations present, and may in fact be system specific.  
97 Therefore, the same inhibitory conditions for NOB in high wastewater strength processes may not  
98 work under domestic wastewater conditions.

99         The measurement of  $K_s$  and  $\mu_{\max}$  for oxygen is also impacted by the physical properties of  
100 the microbial aggregates (Martins et al 2004, Picioreanu et al 2016). In activated sludge wastewater  
101 treatment systems, nitrifiers grow in microcolonies within flocs (Daims et al 2001b, Mobarry et al  
102 1996, Wagner et al 1995) which affects the mass transfer rate of substrate to the cells. Picioreanu  
103 *et al.* (2016) showed by 3D modelling that the reversal of  $K_s$  (i.e. NOB lower than AOB) is an  
104 artifact of the generally larger average microcolony sizes of AOB compared to NOB coupled with  
105 the higher oxygen yield of AOB over NOB, with the former having greater influence on the  $K_s$  for  
106 oxygen. DO is consumed more quickly in AOB clusters, resulting in DO limitation and lower  
107 measured activity. The authors concluded that incorporating a description of the physical structure  
108 of the AOB and NOB clusters is crucial to understanding oxygen competition between AOB and  
109 NOB.

110         The aim of this study was, therefore, to resolve the contributions of different genera and  
111 microcolony morphologies to the oxygen half saturation constant ( $K_s$ ) of NOB and AOB.  
112 Deconvoluting the contributions of genera and microcolony morphologies to  $K_s$  was achieved by

113 combining AOB and NOB microbial community characterisation in activated sludge with the  
114 determination of their respective apparent oxygen half saturation constant,  $K_{S(\text{app})}$  and physical  
115 properties of the AOB and NOB clusters using 3D-fluorescence *in situ* hybridization (FISH) and  
116 image analysis. Given that substrate diffusion into the microcolonies may be rate limiting, we  
117 consider the measured  $K_{S(\text{app})}$  values as an upper estimate for the half-saturation constant. In  
118 addition, the effect of varying oxygenation levels on AOB and NOB activity was also investigated  
119 in a long term lab-scale reactor. The findings suggest that cluster shape and size are a consequence  
120 of rather than the cause of different  $K_{S(\text{app})}$  which may serve as a mechanism that enables AOB and  
121 NOB with distinct preference for oxygen to coexist within the same ecological niche at a certain  
122 range of DO concentration. This also informs competition dynamics between two key players in  
123 nitrification and can lead to improved DO control strategies for achieving nitrification for more cost  
124 effective wastewater treatment.

## 125 **Materials and Methods**

### 126 *Sampling of activated sludge from major WWTPs treating domestic wastewater*

127 Activated sludge was sampled from three main WWTPs (Plants 1, 2 and 3) collectively treating  
128 90% of the total domestic wastewater loading in Singapore. Three sampling events were carried  
129 out for each plant between December 2016 and February 2017. On each sampling event, liquid  
130 samples were collected from the influent and effluent of the activated sludge treatment unit. The  
131 collected liquid samples were filtered with 0.22- $\mu\text{m}$  disposable sterile filters and analyzed for  
132 ammonium, nitrate, nitrite and orthophosphate. Non-filtered liquid samples collected from the  
133 influent were immediately acidified with sulfuric acid and analyzed for total chemical oxygen  
134 demand (TCOD). Samples for DNA extraction and fluorescence *in situ* hybridization (FISH) were  
135 collected from the mid aerobic zone. Samples for DNA extraction were snap-frozen in liquid

136 nitrogen and stored at -80 °C until extraction. Samples for FISH were immediately fixed in 4%  
137 paraformaldehyde and were washed twice with 1% phosphate-buffered saline solution after 2 h  
138 and stored at -20 °C in a 50:50 mixture of 1% phosphate-buffered saline solution and 100%  
139 ethanol.

#### 140 *Long-term lab-scale reactor start-up and operation*

141 A sequencing batch reactor (SBR) with a working volume of 4 L was seeded with returned  
142 activated sludge (RAS) from Plant 3 that receives domestic wastewater at a rate of 800,000 m<sup>3</sup>/day.  
143 Wastewater was collected from the plant once a week and stored in a chiller at 4 °C as feed for the  
144 SBR. The nutrient content of the wastewater was analysed for every batch of wastewater and is  
145 summarised in Table S1 (Supporting Information). The SBR was operated to achieve partial  
146 nitrification mode (50% conversion of ammonium to nitrite, with the remaining ammonium  
147 unconverted) for the first 150 days of operation and switched to nitrification (complete conversion  
148 of ammonium to nitrite) mode thereafter. Anoxic phases for denitrification were also included in  
149 the SBR operation to exhaust the organics in the wastewater as well as to restore the alkalinity in  
150 the reactor. Therefore, pH was not specifically controlled in the reactor but stabilised between 6.3  
151 and 7.0. The effect of DO concentration on nitrite accumulation was investigated by varying the  
152 DO setpoint between 0.5 and 5.5 mg O<sub>2</sub>/L. In addition, the effect on the length of aeration period  
153 on the AOB and NOB activities were also investigated by switching the SBR operation from two  
154 to three feeding phases while maintaining the overall wastewater loading rate with a total SBR  
155 cycle time of eight hours. When the SBR was operated in the cycle with two feeding phases, 1.5  
156 L of wastewater was fed into the reactor over 75 min of slow feeding and each feeding phase was  
157 followed by 60 min of anoxic phase and 60 min of aerobic phase. The whole cycle ended with 90  
158 min of settling and decanting. When switched to the cycle with three feeding phases, the SBR was

159 fed with 1.0 L of wastewater over each 50 min feeding. The following anoxic phases were  
160 shortened to 30 min and aerobic phases were shortened to 18-40 min depending on the DO set  
161 point. The length of the settling and decant phase was adjusted accordingly to maintain the overall  
162 cycle at eight hours, thus resulting in a hydraulic retention time (HRT) of 10.7 h. A heating jacket  
163 was connected to maintain the SBR temperature at  $31.0 \pm 0.5$  °C, typical temperature of domestic  
164 wastewater in Singapore. DO and pH were continuously monitored using Mettler Toledo-InPro  
165 3250i pH sensor and Mettler Toledo InPro6050 DO sensor, respectively. The solid retention time  
166 (SRT) was not controlled for the first 160 days of reactor operation and was estimated to be  $14.4$   
167  $\pm 2.0$  days due to the inevitable sludge loss with the effluent. When stable partial nitrification was  
168 achieved, the SBR was switched to nitrification mode from day 151 onwards by increasing the length  
169 of the aerobic phase to investigate whether NOB will recur with extended aeration. In addition,  
170 the SRT was controlled at approximately 8 days from day 161 onwards, based on measured total  
171 suspended solids (TSS) of the mixed liquor in the SBR and effluent TSS. Each operational change  
172 in DO set point, aeration cycle length (either during the switch from two to three feeding phases  
173 or from partial nitrification to nitrification mode) and solid retention time was implemented  
174 individually and separated as different experimental phases (I to X) as summarised in Table 2.  
175 Samples were collected periodically at the end of the cycle and filtered immediately with  $0.2 \mu\text{m}$   
176 filters.

#### 177 *Batch activity experiments & analytical procedures*

178 Three types of activity batch tests were conducted using Plant 3 returned activated sludge (RAS):  
179 (1) AOB activity test, (2) NOB activity test and (3) simultaneous AOB and NOB activity tests.  
180 Given that AOB and NOB microcolonies are found to cluster in close proximity to one and another  
181 the simultaneous AOB and NOB activity tests are important to elucidate how oxygen consumption



182 would impact oxygen availability and hence each other's activity (Picioreanu et al 2016). All three  
183 activity tests were conducted at DO concentrations of  $0.5 \pm 0.1$ ,  $1.5 \pm 0.1$ ,  $2.5 \pm 0.1$ ,  $5.5 \pm 0.1$  and  
184  $6.5 \pm 0.1$  mg O<sub>2</sub>/L. Additional DO concentrations of  $0.2 \pm 0.1$  and  $0.3 \pm 0.1$  mg O<sub>2</sub>/L were carried  
185 out for the NOB activity test and the simultaneous AOB and NOB activity test, respectively. DO  
186 concentration was manually controlled in all batch tests using a gas mixture of N<sub>2</sub> and air  
187 independently connected to two rotameters. Fresh sludge was collected every 48 h and diluted with  
188 effluent from the lab-scale SBR at a 1:1 ratio before each batch experiment. When steady nitrification  
189 activity was achieved in the lab-scale SBR, sludge was also collected to perform AOB activity  
190 batch test at the aforementioned DO concentrations. Ammonium or nitrite was added at the start  
191 of the AOB or nitrite oxidising batch activity tests to an initial concentration of 25 mg N/L and 15  
192 mg N/L, respectively. Both ammonium and nitrite were provided to initiate the simultaneous AOB  
193 and NOB activity tests. All activity tests were conducted in triplicate with the pH controlled at  $7.0$   
194  $\pm 0.1$  with addition of 0.5 M sodium bicarbonate solution. Nutrient samples were collected every  
195 10-20 min and filtered immediately with 0.2 µm filters. Mixed liquor samples were collected for  
196 suspended solids (MLSS) and volatile suspended solids (MLVSS) analyses at the start of every  
197 batch experiment.

198 Filtered samples were analysed for ammonium, nitrite, nitrate, orthophosphate and soluble  
199 COD. Ammonium and COD were measured using Hach® kits whereas nitrate, nitrite and  
200 orthophosphate were analysed using ion chromatography (Prominence, Shimadzu). Total Kjeldahl  
201 Nitrogen (TKN) was measured using a total nitrogen measuring unit (Shimadzu). MLSS and  
202 MLVSS were analyzed according to the standard methods (APHA 2005).

203 *Estimation of AOB and NOB associated kinetics*

204 A Monod-based model with well-established biokinetics of AOB and NOB was applied  
205 (Wiesmann 1994) to gain further insight into the microbial interactions between AOB and NOB  
206 involved in this work. Table S2 in the Supporting Information summarizes the stoichiometrics and  
207 kinetics of the model, while Table S3 lists the definitions, values, units and sources of all  
208 parameters used in the model. In this work, we particularly evaluated the maximum growth rate of  
209 AOB ( $\mu_{AOB}$ ) and NOB ( $\mu_{NOB}$ ) and the apparent oxygen half saturation coefficient for AOB ( $K_{O_2}^{AOB}$ )  
210 and NOB ( $K_{O_2}^{NOB}$ ) considering their key roles in regulating the microbial competition between AOB  
211 and NOB, while the literature values for affinity constants of ammonium and nitrite were used due  
212 to the excessive supply of ammonium (20-25 mg N/L) or nitrite (15 mg N/L) applied in the activity  
213 batch tests in comparison to the reported relatively low affinity constants of ammonium and nitrite  
214 as shown in Table S2.

215 Specifically, the NOB biokinetics (i.e.,  $\mu_{NOB}$  and  $K_{O_2}^{NOB}$ ) were first calibrated and validated  
216 using the NOB activity batch tests conducted on the Plant 3 sludge fed with nitrite at various  
217 controlled DO levels (0.2, 0.5, 1.5, 2.5, 5.5 and 6.5 mg/L). On top of the NOB biokinetics obtained,  
218 the calibration and validation of the AOB biokinetics (i.e.,  $\mu_{AOB}$  and  $K_{O_2}^{AOB}$ ) was then carried out  
219 using AOB activity batch tests conducted on Plant 3 sludge fed with ammonium at different DO  
220 levels of 0.5, 1.5, 2.5, 5.5 and 6.5 mg/L. The NOB and AOB biokinetics was also validated with  
221 simultaneous AOB and NOB activity batch tests data. The obtained biokinetics of AOB and NOB  
222 was further applied to verify the dominance of AOB over NOB after enrichment using batch tests  
223 conducted on the lab enriched sludge fed with ammonium at the aforementioned DO levels.  
224 Biomass concentrations used in the model evaluation process were set based on the MLVSS  
225 measurements in combination with the microbial abundance analysis detailed in the following

226 section. The model was implemented on the software AQUASIM 2.1d (Reichert 1998) and  
227 configured according to the specific conditions of the batch tests as described in the earlier section.

228 **Microbial Community Characterisation.** Biomass samples collected periodically from the lab-  
229 scale reactor and from the wastewater treatment plants for DNA extraction were stored at -80°C.  
230 The DNA was extracted based on the FastDNATM 2 mL SPIN Kit for Soil (MP Biomedicals,  
231 USA) optimised for DNA extraction from activated sludge (Albertsen et al 2015). 16S rRNA gene  
232 amplicon sequencing was conducted by DNASense (<http://dnasense.com/>) to determine the  
233 microbial community structure of the activated sludge. Bacterial primers 27F  
234 (AGAGTTTGATCCTGGCTCAG, Lane 1991) and 534R (ATTACCGCGGCTGCTGG, (Muyzer  
235 et al. 1993)) were used to amplify an approximately 500 bp DNA fragment of the 16S rRNA gene  
236 (variable V1 to V3 regions). Amplification of PCR was done using the following conditions: 2  
237 min of 95°C, 20 sec for 30 cycles of 95°C, 30 sec of 56°C, 60 sec of 72°C, and a 5 min elongation  
238 step at 72°C. This amplification utilized 1X Platinum® High Fidelity buffer, 2 mU Platinum® Taq  
239 DNA Polymerase High Fidelity, 400 pM dNTP, 1.5 mM MgSO<sub>4</sub>, 5 uM V1-V3 adaptor mix  
240 (barcoded), and 10 ng of template DNA. Purification of PCR products was done using the  
241 Agencourt AmpureXP (Beckman Coulter Inc., U.S.A.) with 1.8 bead solution/PCR solution ratio.  
242 The QuantIT HS kit (Life Technologies, USA) was used to quantify the DNA concentration. Using  
243 Illumina MiSeq (Illumina Inc., USA), barcoded amplicons, which were pooled in equimolar  
244 amounts, were paired-end sequenced (2x250 bp).

245 The output from the MiSeq (Illumina Inc., San Diego, California, USA) was de-  
246 multiplexed from the amplicon libraries in FASTQ-format for each sample in the composite  
247 library. Pre-processing of all amplicon libraries was performed according to Albertsen *et al.*

248 (Albertsen et al 2015), and all sequenced sample libraries were subsampled to 10,000 raw reads.  
249 Taxonomy was assigned using MiDAS v.1.20 (McIlroy et al 2015) with 97% clustering identity.

### 250 *Fluorescence in situ Hybridisation (FISH) and image processing*

251 The method described by Daims et al. (Daims et al 2001a) was used to prepare biomass samples  
252 for FISH analysis. The following probes were used: NSO1225 and NSO190, specific for ammonia  
253 oxidizing betaproteobacteria; Ntspa662 targeting all *Nitrospira*; and EUB-mix (EUB338,  
254 EUB338-II, and EUB338-III), covering most bacteria. All probes were either labeled with  
255 indocarbocyanine (Cy3 or Cy5) or 6-carboxyflorescein (6-FAM). Z-stacks of FISH-probed  
256 samples were acquired using a Zeiss LSM 780 inverted confocal microscope equipped with  
257 100x/NA1.4 oil immersion objective (Carl Zeiss, Jena, Germany) and pre-processed using FIJI  
258 (background subtraction, 3D median) (Schindelin et al 2012). DAIME software was used for 3D  
259 visualization, segmentation and quantification of bacterial clusters (Daims et al 2006). Surface,  
260 volume, surface-to-volume ratio and shape were measured for every recognized cluster in  
261 respective AOB and NOB channels for 20 distinct regions-of-interest (ROIs). Unpaired  
262 nonparametric Mann-Whitney U test was conducted to assess differences between AOB and NOB  
263 clusters.

## 264 **Results**

265 **Diversity of nitrifying communities in major WWTPs.** A single *Nitrospira* sublineage I OTU  
266 was the predominant NOB member in all three treatment plants sampled (Figure 1), despite  
267 differences in process design and operational conditions. In contrast, up to 18 OTUs in the family  
268 Nitrosomonadaceae were detected by 16S rRNA gene amplicon sequencing analysis, of which  
269 only eight were assigned to the genus *Nitrosomonas* (Figure 1). Other known ammonia oxidizing  
270 and nitrite oxidizing taxa were not detected. The collective relative abundance of OTUs of AOB

271 was lower than that of NOB in Plants 2 and 3, with ratios of NOB to AOB of 2.6 and 5.5,  
272 respectively (Figure 1 and Table 1). The opposite was observed for Plant 1 where AOB were  
273 present at a higher abundance relative to NOB with a ratio of NOB to AOB of 0.5. Apart from the  
274 difference in plant design, Plant 1 had the highest DO concentration in the aerobic zone and the  
275 longest SRT compared to Plants 2 and 3 (Table 1). The lower relative abundance of AOB in these  
276 plants is also reflected in the ammonium removal efficiency with a higher residual ammonium  
277 concentration compared to that of Plant 1 (Table 1). This increase in AOB:NOB ratio under higher  
278 DO condition in a full-scale WWTP is consistent with the observation that NOB have higher  
279 relative oxygen affinities. High DO could also be potentially toxic to *Nitrospira*. Thus, to confirm  
280 that DO can be used to select against NOB, sludge from Plant 3 (with a high NOB:AOB ratio) was  
281 transferred to a lab-scale reactor, exposed to a range of DO conditions, and the AOB to NOB  
282 competition dynamics were observed.

283 **Dynamics of microbial community structure in response to varying DO set points.** The DO  
284 concentration and length of aeration phase were systematically varied in each experimental phase  
285 to investigate DO selection against NOB in a lab-scale reactor (Table 2). Consistent with what was  
286 observed in the full-scale plant, only a single *Nitrospira* sublineage I OTU was detected whereas  
287 multiple OTUs were annotated to Nitrosomonadaceae throughout the experiment. In experimental  
288 phases I, II and III, all of the ammonium oxidised by AOB was converted to nitrate by NOB when  
289 DO set points of < 1.5 mg O<sub>2</sub>/L were applied (Table 2 and Figure 2A). *Nitrospira* sublineage I had  
290 a much higher relative abundance than AOB during these initial experimental phases (Figure 2B).  
291 The increase in DO set point to 2.0 – 2.5 mg O<sub>2</sub>/L resulted in a slight increase in the nitrite:NO<sub>x</sub>  
292 (sum of nitrite and nitrate in the effluent) ratio in experimental phase IV and a corresponding  
293 reduction in the relative abundance of *Nitrospira* from 3.7% to 2.1%, albeit it was still more

294 abundant than AOB (Figure 2B). When the aeration phase was shortened from 60 min to 20 – 35  
295 min while maintaining the DO set point at 2.0 – 2.5 mg O<sub>2</sub>/L (Table 2), no apparent change was  
296 observed in both the relative abundance of *Nitrospira* and nitrite production. *Nitrospira* gradually  
297 decreased to below the detection limit in experimental phase VI, when the DO set point was further  
298 increased to 4.5 – 5.5 mg O<sub>2</sub>/L, and partial nitrification was achieved with a concomitant increase in  
299 final effluent nitrite concentration and the overall nitrite:NO<sub>x</sub> ratio (Figure 2A and B). Nitrite  
300 accumulation was sustained with subsequent changes in operational conditions, including 1)  
301 extension of the aerobic period to achieve complete conversion of ammonium to nitrite (nitrification)  
302 in experimental phase VII; 2) decrease in SRT in experimental phase VIII; and 3) return of the DO  
303 concentration back to 1.0 – 1.5 mg O<sub>2</sub>/L in experimental phase VIII and 0.5 – 1.0 mg O<sub>2</sub>/L in  
304 experimental phase X (Figure 2A and B, Table 2).

305         In addition to *Nitrospira*, two OTUs annotated to the genera *Candidatus Amarilinum* and  
306 *Blastocatella* decreased in relative abundance with increasing DO concentration. The  
307 disappearance of *Nitrospira* also coincided with the proliferation of multiple heterotrophic taxa  
308 belonging to the families Chitinophagaceae, Saprospiraceae, Comamonadaceae and PHOS-HE51  
309 (Figure 2C), which could be a consequence of increased availability of nitrite or organic carbon  
310 sources or both. These taxa displayed cyclical dynamics whereby the increase in relative  
311 abundance of one OTU was at the expense of another, indicative of competition for a limiting  
312 resource (Figure 2C). The changes in relative abundances were particularly apparent when the  
313 SRT was decreased to 8 days in experimental phase VIII, with a *Comamonadaceae* OTU  
314 increasing periodically in relative abundance up to approximately 34%. However, most other  
315 heterotrophic bacteria were present at relative abundances of <1% throughout all experimental  
316 phases.

317 In contrast to the effect on the NOB population in the activated sludge, we observed that  
318 ammonium oxidation was not compromised across a wide range of oxygen concentrations in the  
319 lab-scale reactor. While multiple AOB OTUs were detectable during the various experimental  
320 phases, different OTUs seemed to predominate at different DO set points, in line with the  
321 correlation between diversity and functional stability (Yachi and Loreau 1999). In addition, the  
322 AOB community appeared to be resilient with higher similarity between samples collected on day  
323 56 (phase IV) and day 350 (phase X) than on day 212 (phase VIII) (Figure 1), indicating that the  
324 AOB community returned to a stage close to its original composition when the DO concentration  
325 was changed back to low concentrations after a long period of high oxygenation (Figures 1 and 2).  
326 Thus, increasing the oxygen set point in a NOB-rich sludge dominated by *Nitrospira* sublineage I  
327 resulted in inhibition of nitrite oxidation and eventual wash out of nitrite oxidizers from the system,  
328 consistent with the observation in the full-scale treatment plants that *Nitrospira* has a preference  
329 for lower oxygen concentrations compared to the coexisting AOB.

330 **Nitrifying activity in response to varying DO set points.** To further understand the competitive  
331 dynamics between AOB and NOB in Plant 3 sludge for oxygen, the ammonia and nitrite oxidizing  
332 activities were characterized across a wide range of DO concentrations (Figure 3). Comparable  
333 nitrite oxidizing activities were observed in batch experiments in the presence of nitrite only (i.e.  
334 NOB activity test) and when both nitrite and ammonia were supplied (i.e. simultaneous AOB and  
335 NOB activity tests) at DO concentrations from 0.2 to 6.5 mg O<sub>2</sub>/L (Figure 4). In both NOB activity  
336 test and simultaneous AOB and NOB activity tests on Plant 3 sludge, the maximum specific nitrite  
337 oxidizing activity of approximately 6.0 mg N/h/g VSS was attained at a DO concentration of 1.5  
338 mg O<sub>2</sub>/L. In contrast, a lower maximum specific ammonium oxidizing activity of 7.1 mg N/h/g  
339 VSS was observed in the simultaneous AOB and NOB batch activity tests compared to 9.3 mg

340 N/h/g VSS in the AOB-only batch activity tests (i.e. ammonium only) (Figure 4). In the lab-scale  
341 reactor, following the wash out of the NOB, a much higher maximum ammonium oxidation rate  
342 of approximately 12.2 mg N/h/g VSS was achieved, suggesting that AOB activity in the sludge  
343 was significantly impacted when NOB activity was simultaneously occurring, whereas the NOB  
344 activity was not affected by concurrent oxygen consumption by AOB. The maximum AOB  
345 activities in all cases were higher than those of NOB and were attained at a DO concentration of  
346 2.5 mg O<sub>2</sub>/L (Figure 4). However, in the simultaneous AOB and NOB batch activity tests at DO  
347 concentrations <1.5 mg O<sub>2</sub>/L, the nitrite oxidation rates were higher than the ammonia oxidation  
348 rates (Figure 4), further supporting that *Nitrospira* in Plant 3 sludge have lower relative *K*<sub>s</sub> for  
349 oxygen compared to *Nitrosomonas*-like AOB. The comparable nitrite oxidizing activity beyond  
350 DO concentration of 1.5 mg O<sub>2</sub>/L (up to 6.5 mg O<sub>2</sub>/L) also suggests that NOB are able to cope  
351 with the relatively high oxygen concentration and that the wash out of NOB observed in the long-  
352 term lab-scale study was from the imbalance in their ability to compete for oxygen with AOB  
353 when DO concentration was increased.

354 **Microbial kinetics of AOB and NOB.** The various batch experiments were then modelled  
355 according to a Monod-based model for AOB and NOB (Wiesmann 1994) and the apparent *K*<sub>s(app)</sub>  
356 and  $\mu_{\max}$  of the AOB and NOB were determined in batch tests (Figure 3). The good agreement  
357 between model predictions and measured results supported the validity of the estimated kinetic  
358 parameters (i.e., maximum growth rates and oxygen saturation constants of AOB and NOB) to  
359 describe the competitive dynamics between AOB and NOB at varying DO levels. The oxygen  
360 *K*<sub>s(app)</sub> for AOB in Plant 3 sludge was estimated to be  $0.30 \pm 0.03$  mg O<sub>2</sub>/L, higher than that of  
361 NOB with an estimated value of  $0.09 \pm 0.02$  mg O<sub>2</sub>/L (Table S3, Supporting Information). In  
362 addition, the estimated  $\mu_{\max}$  of  $0.126 \pm 0.003$  h<sup>-1</sup> of AOB was almost ten times that of NOB, at



363  $0.0128 \pm 0.0003 \text{ h}^{-1}$  (Table S3, Supporting Information). The estimated kinetic parameters suggest  
364 that *Nitrosomonas*-like AOB will outgrow *Nitrospira* in Plant 3 sludge when oxygen supply is  
365 high, whereas *Nitrospira* will predominate under oxygen limitation conditions; this could explain  
366 their high relative abundance in Plants 2 and 3. In addition, using the estimated kinetic parameters,  
367 the model was able to reproduce the batch experiment results with the lab-scale sludge, which  
368 further supports that the washout of *Nitrospira* was a result of operation at high DO.

369 **Physical properties of AOB and NOB microcolonies.** To determine whether the lower  $K_{S(app)}$  of  
370 the NOB compared to AOB was an artifact of microcolony size, three dimensional FISH imaging  
371 was carried out on Plant 3 sludge to visualize the AOB and NOB colonies followed by image  
372 processing (Figure 5). Both AOB and NOB form cell clusters and reside in close proximity to each  
373 other. Image analysis revealed high variability in the volume and surface area of both AOB and  
374 NOB microcolonies (Figure S1, Supporting information). Cluster sizes are therefore not uniformly  
375 distributed in the sludge. However, while the total surface area of the AOB clusters were  
376 significantly larger compared to that of the NOB clusters ( $p \text{ value} = 0.0272$ ), the NOB clusters  
377 consistently occupied a higher volume than the AOB clusters ( $p \text{ value} = 0.0018$ ). Thus, despite  
378 inconsistent cluster sizes, the AOB microcolonies had significantly higher surface area to volume  
379 ratios than did NOB microcolonies ( $p \text{ value} < 0.0001$ ) and displayed far higher morphological  
380 variability. AOB microcolonies were less regular in appearance compared to those of NOB, which  
381 tended to be more spherical (Figures 5 and 6). The irregularity in shape resulted in conflicting  
382 maximum and minimum diameter of the microcolonies indicating that microcolony description  
383 based on size is not sufficient when describing substrate diffusion (Figure S2, Supporting  
384 Information).

385

## 386 Discussion

387 Dissolved oxygen (DO) concentration is a key factor regulating biogeochemical cycling in  
388 natural environments (Falkowski et al 2008) and also commonly used in wastewater treatment  
389 processes to shift microbial community dynamics towards operationally favored populations. In  
390 some instances this is obvious, such as when selecting for aerobes over anaerobes. In others,  
391 however, the application of DO as a tool to affect community composition and specific populations  
392 becomes more nuanced, such as selecting between two aerobes on the basis of different oxygen  
393 affinities. One example is selecting for AOB over NOB, which is attractive as a complement to  
394 Anammox in order to reduce operating costs. However, understanding the competition dynamics  
395 between AOB and NOB for oxygen is confounded by a combination of physical and biological  
396 factors acting at different scales, all the way from micro- to macro-scale (Arnaldos et al 2015,  
397 Picioreanu et al 2016). In this study, we resolved physicochemical and biological aspects of  
398 AOB/NOB interactions in full-scale activated sludge systems by integrating kinetic, microbial  
399 community and microcolony structure characterization along with field sampling and short term  
400 and long term lab-scale experimentation. Contrary to the paradigm that lower DO concentrations  
401 eliminate NOB in nitrogen rich side stream systems (Lackner et al 2014), we observed in this study  
402 into activated sludge systems receiving relatively low nitrogen loadings that the opposite was true.

403         Based on 16S rRNA gene amplicon sequencing, the NOB community composition was  
404 highly enriched compared to AOB within the same system, with a single *Nitrospira* sublineage I  
405 OTU dominating across different treatment plants in Singapore. When subjected to perturbations  
406 in oxygenation levels (Figure 2), *Nitrospira* numbers decreased in relative abundance with  
407 increasing DO concentration and were eventually washed out from the lab-scale system altogether  
408 (Figure 2). The nitrite oxidizing activity did not recover and sustained nitrite accumulation was

409 observed even at low DO concentrations. The inability to reverse the nitrite oxidizing activity at  
410 lower DO concentration demonstrates that high DO operation may only be required for a short  
411 period of time to suppress NOB activity, after which oxygen levels can be adjusted depending on  
412 process requirement. This provides operational flexibility when combining partial nitrification with  
413 Anammox to achieve nitrogen removal, whereby a one-stage partial nitrification-Anammox system  
414 will require low oxygen levels to prevent inhibition of Anammox bacteria, whereas higher oxygen  
415 levels can be applied for a two-stage partial nitrification-Anammox system to maximize conversion  
416 rates. The prevalence of the same *Nitrospira* OTU across different treatment plants also suggests  
417 that under wastewater conditions in Singapore nitrification may be consistently achieved through  
418 high DO selection.

419 NOB are a highly diverse functional group that possesses fundamental ecophysiological  
420 diversity mainly stemming from differences in affinity to nitrite and energetic yield depending on  
421 the localization of the enzyme nitrite oxidoreductase (NXR) (Daims et al 2016). Environmental  
422 conditions such as DO concentration (Park and Noguera 2008), temperature (Alawi et al 2009,  
423 Daims et al 2001b, Siripong and Rittmann 2007) and pH (Hüpeden et al 2016) have also been  
424 shown to drive niche differentiation of NOB. The absence of OTUs from the other NOB genera in  
425 this study is not unexpected given the lack of temporal fluctuations in the plants and the year round  
426 stable wastewater temperature of 30 °C, which favours *Nitrospira* over *Nitrotoga* (Alawi et al  
427 2009), and the relatively diluted ammonium content with a continuous flow configuration that  
428 limits the nitrite production rate by AOB. Such conditions favour the selection of *Nitrospira* taxa  
429 that possess a periplasmic NXR with a high nitrite affinity, allowing them to adapt to low nitrite  
430 concentrations (Lücker et al 2010, Schramm et al 1999) as opposed to *Nitrobacter* that have higher  
431 nitrite conversion rates but lower nitrite affinity (Kim and Kim 2006). On the contrary, excess

432 ammonium availability will result in dynamic changes in ammonium profiles that potentially  
433 provide ecological niches for the co-occurrence of multiple AOB strains (Daims et al 2001b, Ke  
434 et al 2013). Mass balance analysis revealed a significantly higher proportion of NOB compared to  
435 AOB in Plants 2 and 3, suggesting that the growth of *Nitrospira* was not exclusively dependant on  
436 autotrophic nitrite oxidation. Indeed, mixotrophic growth has been shown for *Ca. Nitrospira*  
437 *defluvii* (Spieck et al 2006) and *Nitrospira marina* (Watson et al 1986). The *Ca. N. defluvii* genome  
438 also contains genes that encode pathways for the transport, oxidation, and assimilation of simple  
439 organic compounds (Lücker et al 2010). In the lab-scale reactor, the increase in a number of  
440 heterotrophic taxa after *Nitrospira* was washed out from the system suggests that they occupy the  
441 same ecological niche. The antagonistic relationships between OTUs annotated to  
442 Chitinophagaceae, Saprospiraceae and Comamonadaceae (Figure 2C) are more likely to be due to  
443 competition for organic carbon than nitrite given that nitrite was always in excess when *Nitrospira*  
444 had been inhibited. In the case of Plant 1 where an anaerobic zone is a plant design feature to  
445 maximise organic carbon uptake by heterotrophic bacteria, AOB were more abundant than NOB,  
446 further suggesting potential antagonistic interactions between *Nitrospira* and heterotrophs in  
447 activated sludge. However, the higher operational DO concentration and longer SRT may also  
448 have had an impact on the observed higher proportion of AOB to NOB. Nevertheless, nitrite did  
449 not accumulate in any of the investigated plants, indicating that it was consumed immediately  
450 either by NOB or by heterotrophic bacteria.

451 While 16S rRNA gene amplicon sequencing may not be able to provide subspecies level  
452 resolution for *Nitrospira* (Gruber-Dorninger et al 2015), the decline of the detected *Nitrospira*  
453 OTU in the long-term lab-scale experiment suggests that multiple species under sublineage I, if  
454 present, are not well adapted to high oxygen concentration. This was also reflected in the  $K_{S(app)}$

455 that was determined to be three-fold lower than that of AOB and also in the significantly lower  
456 estimated  $\mu_{\max}$ , indicating that *Nitrospira* will thrive under low oxygen conditions. In addition,  
457 batch experiments showed that the AOB activity was significantly affected by the simultaneous  
458 oxygen consumption by NOB, in contrast to model predictions by Picioreanu *et al.* (2016). The  
459 *Ca. N. defluvii* genome shows the presence of the reductive tricarboxylic acid (rTCA) cycle, the  
460 anaerobic cobalamin biosynthesis pathway, and the lack of genes for protection against reactive  
461 oxygen species (ROS) normally present in most aerobic organisms, suggesting *Nitrospira* is of  
462 anaerobic or microaerophilic origin (Lücker *et al* 2010). In fact, comparative genomics revealed  
463 an evolutionary link between *Nitrospira* and anammox organisms (Lücker *et al* 2010). Both AOB  
464 and NOB are known to grow in microcolonies with near spherical shape (Daims *et al* 2001b,  
465 Mobarry *et al* 1996, Vejmekova *et al* 2012, Wagner *et al* 1995). The growth of *Nitrospira* in  
466 aggregates has been proposed to potentially offer additional protection to cope with oxidative  
467 stress (Lücker *et al* 2010).

468 Our study shows that AOB and NOB exhibited microcolonies of distinct morphology when  
469 subjected to the same level of oxygenation in Plant 3 of  $1.2 \pm 0.2$  mg O<sub>2</sub>/L (Figures 5 and 6).  
470 *Nitrospira* formed tightly packed and dense colonies with a lower surface area to volume ratio that  
471 limits mass transfer of oxygen in agreement with kinetic properties determined in this study and  
472 their preference for lower oxygen concentrations. In contrast, *Nitrosomonas*-like AOB formed  
473 open porous aggregates with a high surface area to volume ratio that maximises diffusional mass  
474 transfer. Porous colonies are expected to yield lower  $K_{S(app)}$  values (i.e., higher affinity), whereas  
475 dense colonies would lead to the reverse (Martins *et al* 2004). Yet, the estimated  $K_{S(app)}$  for NOB  
476 is still significantly lower than that of AOB, suggesting that the intrinsic oxygen affinity constant  
477 (i.e., not affected by diffusion) of NOB could be even lower than the estimated value in this study.

478 While AOB are generally thought to form larger colonies than NOB based on the measurement of  
479 colony diameter (Coskuner et al 2005, Manser et al 2005, Picioreanu et al 2016), we show that  
480 colony characterization solely based on diameter may lead to skewed conclusions given the  
481 inconsistency between the maximum and minimum diameter of non-spherical colonies (Figure S2,  
482 Supporting Information). Therefore, our results are contrary to the contention of Picioreanu *et al.*  
483 (2016) that observation of a lower oxygen affinity for NOB could be the consequence of the  
484 difference in microcolony size.

485 Collectively, the findings suggest that nitrifiers may regulate microcolony structure  
486 formation depending on their intrinsic physiological and kinetic properties and environmental  
487 conditions. Such capability may assist them to survive under a broader range of environmental  
488 conditions and interact and coexist with partners that are adapted to distinct environments. For  
489 NOB, the lower surface area to volume ratio would impair oxygen capture, which in agreement  
490 with Lücker et al. (2010), could protect *Nitrospira* against oxidative stress allowing them to still  
491 perform nitrite oxidation at high oxygen concentrations up to 6.5 mg O<sub>2</sub>/L. In contrast, the porous  
492 microcolonies formed by the AOB in Plant 3 suggest that oxygen was limiting but such  
493 microcolony formation would allow maximum oxygen transfer to sustain ammonia oxidizing  
494 activity. Therefore, stable and active populations of *Nitrosomonas*-like AOB and *Nitrospira* can  
495 be maintained in domestic wastewater treatment plants between low and intermediate DO set  
496 points but the partnership can still be destabilised with a high operating DO as demonstrated in  
497 this study. Further investigation is required to understand whether microcolony structure formation  
498 is regulated by external stimuli or is a consequence of environmental selection for specific strains  
499 with a defined morphotype. The regulation of microcolony structure may also be a survival  
500 strategy for anaerobes to persist in suboxic to oxic environments.

501 **Conflict of Interest**

502 The authors declare no conflict of interest.

503 **Acknowledgements**

504 This research was supported by the Singapore National Research Foundation and Ministry of  
505 Education under the Research Centre of Excellence Programme, by a program grant from the  
506 National Research Foundation (NRF), project number 1301-IRIS-59, and the National Medical  
507 Research Council (NMRC/CBRG/0086/2015). We thank Mr. Larry Liew and staff from PUB,  
508 Singapore's National Water Agency for performing weekly collection of primary effluent. Dr.  
509 Bing-Jie Ni acknowledges the support of Australian Research Council Future Fellowship  
510 FT160100195. We thank Dr. Kimberly Kline and Dr. Per Halkjær Nielsen for reviewing the  
511 manuscript.

512 **References**

- 513 Alawi M, Off S, Kaya M, Spieck E (2009). Temperature influences the population structure of  
514 nitrite-oxidizing bacteria in activated sludge. *Environmental Microbiology Reports* **1**: 184-190.
- 515 Albertsen M, Karst SM, Ziegler AS, Kirkegaard RH, Nielsen PH (2015). Back to basics - The  
516 influence of DNA extraction and primer choice on phylogenetic analysis of activated sludge  
517 communities. *PLoS ONE* **10**.
- 518 APHA (2005). *Standard Methods for the Examination of Water and Wastewater: Centennial*  
519 *Edition*, 21st edn. American Public Health Association: Washington, D.C.
- 520 Arnaldos M, Amerlinck Y, Rehman U, Maere T, Van Hoey S, Naessens W *et al* (2015). From the  
521 affinity constant to the half-saturation index: Understanding conventional modeling concepts in  
522 novel wastewater treatment processes. *Water Res* **70**: 458-470.
- 523 Bock E, Wagner M (2001). Oxidation of inorganic nitrogen compounds as an energy source. In:  
524 Dworkin M, others (eds). *The Prokaryotes: an Evolving Electronic Resource for the*  
525 *Microbiological Community*, 3rd edn. Springer Verlag: New York
- 526 Coskuner G, Curtis TP (2002). In situ characterization of nitrifiers in an activated sludge plant:  
527 detection of Nitrobacter Spp. *Journal of Applied Microbiology* **93**: 431-437.
- 528 Coskuner G, Ballinger SJ, Davenport RJ, Pickering RL, Solera R, Head IM *et al* (2005).  
529 Agreement between theory and measurement in quantification of ammonia-oxidizing bacteria.  
530 *Applied and Environmental Microbiology* **71**: 6325-6334.



- 531 Daims H, Nielsen JL, Nielsen PH, Schleifer KH, Wagner M (2001a). In situ characterization of  
532 Nitrospira-like nitrite-oxidizing bacteria active in wastewater treatment plants. *Appl Environ*  
533 *Microbiol* **67**: 5273-5284.
- 534 Daims H, Nielsen JL, Nielsen PH, Schleifer KH, Wagner M (2001b). In Situ Characterization of  
535 Nitrospira-Like Nitrite-Oxidizing Bacteria Active in Wastewater Treatment Plants. *Applied and*  
536 *Environmental Microbiology* **67**: 5273-5284.
- 537 Daims H, Lucker S, Wagner M (2006). daime, a novel image analysis program for microbial  
538 ecology and biofilm research. *Environmental Microbiology* **8**: 200-213.
- 539 Daims H, Lebedeva EV, Pjevac P, Han P, Herbold C, Albertsen M *et al* (2015). Complete  
540 nitrification by Nitrospira bacteria. *Nature* **528**: 504-509.
- 541 Daims H, Lucker S, Wagner M (2016). A New Perspective on Microbes Formerly Known as  
542 Nitrite-Oxidizing Bacteria. *Trends in Microbiology* **24**: 699-712.
- 543 Falkowski PG, Fenchel T, Delong EF (2008). The Microbial Engines That Drive Earth's  
544 Biogeochemical Cycles. *Science* **320**: 1034.
- 545 Gieseke A, Bjerrum L, Wagner M, Amann R (2003). Structure and activity of multiple nitrifying  
546 bacterial populations co-existing in a biofilm. *Environmental Microbiology* **5**: 355-369.
- 547 Gruber-Dorninger C, Pester M, Kitzinger K, Savio DF, Loy A, Rattei T *et al* (2015). Functionally  
548 relevant diversity of closely related Nitrospira in activated sludge. *ISME J* **9**: 643-655.
- 549 Hüpeden J, Wegen S, Off S, Lucker S, Bedarf Y, Daims H *et al* (2016). Relative Abundance of  
550 Nitrotoga spp. in a Biofilter of a Cold-Freshwater Aquaculture Plant Appears To Be Stimulated  
551 by Slightly Acidic pH. *Applied and Environmental Microbiology* **82**: 1838-1845.
- 552 Jubany I, Carrera J, Lafuente J, Baeza JA (2008). Start-up of a nitrification system with automatic  
553 control to treat highly concentrated ammonium wastewater: Experimental results and modeling.  
554 *Chemical Engineering Journal* **144**: 407-419.
- 555 Juretschko S, Timmermann G, Schmid M, Schleifer K-H, Pommerening-Röser A, Koops H-P *et*  
556 *al* (1998a). Combined Molecular and Conventional Analyses of Nitrifying Bacterium Diversity in  
557 Activated Sludge: Nitrosococcus mobilis and Nitrospira-Like Bacteria as Dominant Populations.  
558 *Applied and Environmental Microbiology* **64**: 3042-3051.
- 559 Juretschko S, Timmermann G, Schmid M, Schleifer KH, Pommerening-Röser A, Koops HP *et al*  
560 (1998b). Combined molecular and conventional analyses of nitrifying bacterium diversity in  
561 activated sludge: Nitrosococcus mobilis and Nitrospira-like bacteria as dominant populations.  
562 *Applied and Environmental Microbiology* **64**: 3042-3051.
- 563 Ke X, Angel R, Lu Y, Conrad R (2013). Niche differentiation of ammonia oxidizers and nitrite  
564 oxidizers in rice paddy soil. *Environmental Microbiology* **15**: 2275-2292.
- 565 Kim DJ, Kim SH (2006). Effect of nitrite concentration on the distribution and competition of  
566 nitrite-oxidizing bacteria in nitrification reactor systems and their kinetic characteristics. *Water Res*  
567 **40**: 887-894.



- 568 Knapp CW, Graham DW (2007). Nitrite-oxidizing bacteria guild ecology associated with  
569 nitrification failure in a continuous-flow reactor. *FEMS Microbiology Ecology* **62**: 195-201.
- 570 Könneke M, Bernhard AE, De La Torre JR, Walker CB, Waterbury JB, Stahl DA (2005). Isolation  
571 of an autotrophic ammonia-oxidizing marine archaeon. *Nature* **437**: 543-546.
- 572 Lackner S, Gilbert EM, Vlaeminck SE, Joss A, Horn H, van Loosdrecht MCM (2014). Full-scale  
573 partial nitrification/anammox experiences - An application survey. *Water Res* **55**: 292-303.
- 574 Lückner S, Wagner M, Maixner F, Pelletier E, Koch H, Vacherie B *et al* (2010). A Nitrospira  
575 metagenome illuminates the physiology and evolution of globally important nitrite-oxidizing  
576 bacteria. *Proceedings of the National Academy of Sciences* **107**: 13479-13484.
- 577 Malovanyy A, Trela J, Plaza E (2015). Mainstream wastewater treatment in integrated fixed film  
578 activated sludge (IFAS) reactor by partial nitrification/anammox process. *Bioresource Technology*  
579 **198**: 478-487.
- 580 Manser R, Gujer W, Siegrist H (2005). Consequences of mass transfer effects on the kinetics of  
581 nitrifiers. *Water Res* **39**: 4633-4642.
- 582 Martins AMP, Picioreanu C, Heijnen JJ, van Loosdrecht MCM (2004). Three-Dimensional Dual-  
583 Morphotype Species Modeling of Activated Sludge Flocs. *Environmental Science & Technology*  
584 **38**: 5632-5641.
- 585 Matsumoto S, Katoku M, Saeki G, Terada A, Aoi Y, Tsuneda S *et al* (2010). Microbial community  
586 structure in autotrophic nitrifying granules characterized by experimental and simulation analyses.  
587 *Environmental Microbiology* **12**: 192-206.
- 588 McIlroy SJ, Saunders AM, Albertsen M, Nierychlo M, McIlroy B, Hansen AA *et al* (2015).  
589 MiDAS: The field guide to the microbes of activated sludge. *Database* **2015**.
- 590 Mobarry BK, Wagner M, Urbain V, Rittmann BE, Stahl DA (1996). Phylogenetic probes for  
591 analyzing abundance and spatial organization of nitrifying bacteria. *Applied and Environmental*  
592 *Microbiology* **62**: 2156-2162.
- 593 Park HD, Noguera DR (2008). Nitrospira community composition in nitrifying reactors operated  
594 with two different dissolved oxygen levels. *Journal of Microbiology and Biotechnology* **18**: 1470-  
595 1474.
- 596 Picioreanu C, Pérez J, van Loosdrecht MCM (2016). Impact of cell cluster size on apparent half-  
597 saturation coefficients for oxygen in nitrifying sludge and biofilms. *Water Res* **106**: 371-382.
- 598 Purkhold U, Pommerening-Röser A, Juretschko S, Schmid MC, Koops HP, Wagner M (2000).  
599 Phylogeny of all recognized species of ammonia oxidizers based on comparative 16S rRNA and  
600 amoA sequence analysis: Implications for molecular diversity surveys. *Applied and*  
601 *Environmental Microbiology* **66**: 5368-5382.
- 602 Regmi P, Miller MW, Holgate B, Bunce R, Park H, Chandran K *et al* (2014). Control of aeration,  
603 aerobic SRT and COD input for mainstream nitrification/denitrification. *Water Res* **57**: 162-171.
- 604 Reichert P (1998). *AQUASIM 2.0 - Computer Program for the Identification and Simulation of*  
605 *Aquatic Systems*. EAWAG: Dübendorf, Switzerland.

- 606 Schindelin J, Arganda-Carreras I, Frise E, Kaynig V, Longair M, Pietzsch T *et al* (2012). Fiji: an  
607 open-source platform for biological-image analysis. *Nat Methods* **9**: 676-682.
- 608 Schramm A, de Beer D, van den Heuvel JC, Ottengraf S, Amann R (1999). Microscale Distribution  
609 of Populations and Activities of Nitrosospira and Nitrospira spp. along a Macroscale Gradient in  
610 a Nitrifying Bioreactor: Quantification by In Situ Hybridization and the Use of Microsensors.  
611 *Applied and Environmental Microbiology* **65**: 3690-3696.
- 612 Siegrist H, Salzgeber D, Eugster J, Joss A (2008). Anammox brings WWTP closer to energy  
613 autarky due to increased biogas production and reduced aeration energy for N-removal. *Water Sci*  
614 *Technol* **57**: 383-388.
- 615 Siripong S, Rittmann BE (2007). Diversity study of nitrifying bacteria in full-scale municipal  
616 wastewater treatment plants. *Water Res* **41**: 1110-1120.
- 617 Sliemers AO, Haaijer SCM, Stafsnes MH, Kuenen JG, Jetten MSM (2005). Competition and  
618 coexistence of aerobic ammonium- and nitrite-oxidizing bacteria at low oxygen concentrations.  
619 *Applied Microbiology and Biotechnology* **68**: 808-817.
- 620 Spieck E, Hartwig C, McCormack I, Maixner F, Wagner M, Lipski A *et al* (2006). Selective  
621 enrichment and molecular characterization of a previously uncultured Nitrospira-like bacterium  
622 from activated sludge. *Environmental Microbiology* **8**: 405-415.
- 623 Stein LY, Arp DJ (1998). Loss of ammonia monooxygenase activity in Nitrosomonas europaea  
624 upon exposure to nitrite. *Applied and Environmental Microbiology* **64**: 4098-4102.
- 625 Strous M, Heijnen JJ, Kuenen JG, Jetten MSM (1998). The sequencing batch reactor as a powerful  
626 tool for the study of slowly growing anaerobic ammonium-oxidizing microorganisms. *Applied*  
627 *Microbiology and Biotechnology* **50**: 589-596.
- 628 Teske A, Alm E, Regan JM, Toze S, Rittmann BE, Stahl DA (1994). Evolutionary relationships  
629 among ammonia- and nitrite-oxidizing bacteria. *Journal of Bacteriology* **176**: 6623-6630.
- 630 Van Kessel MAHJ, Speth DR, Albertsen M, Nielsen PH, Op Den Camp HJM, Kartal B *et al*  
631 (2015). Complete nitrification by a single microorganism. *Nature* **528**: 555-559.
- 632 Vejmelkova D, Sorokin DY, Abbas B, Kovaleva OL, Kleerebezem R, Kampschreur MJ *et al*  
633 (2012). Analysis of ammonia-oxidizing bacteria dominating in lab-scale bioreactors with high  
634 ammonium bicarbonate loading. *Applied Microbiology and Biotechnology* **93**: 401-410.
- 635 Wagner M, Rath G, Amann R, Koops H-P, Schleifer K-H (1995). In situ Identification of  
636 Ammonia-oxidizing Bacteria. *Systematic and Applied Microbiology* **18**: 251-264.
- 637 Ward BB (2011). *Nitrification: an Introduction and Overview of the State of the Field*. ASM Press  
638 IWA Publishing.
- 639 Watson SW, Bock E, Valois FW, Waterbury JB, Schlosser U (1986). Nitrospira marina gen. nov.  
640 sp. nov.: a chemolithotrophic nitrite-oxidizing bacterium. *Archives of Microbiology* **144**: 1-7.
- 641 Wett B, Omari A, Podmirseg SM, Han M, Akintayo O, Gómez Brandón M *et al* (2013). Going for  
642 mainstream deammonification from bench to full scale for maximized resource efficiency. *Water*  
643 *Sci Technol* **68**: 283-289.

644 Wiesmann U (1994). Biological nitrogen removal from wastewater. *Advances in Biochemical*  
645 *Engineering/Biotechnology* **51**: 113-154.

646 Yachi S, Loreau M (1999). Biodiversity and ecosystem productivity in a fluctuating environment:  
647 The insurance hypothesis. *Proceedings of the National Academy of Sciences of the United States*  
648 *of America* **96**: 1463-1468.

649 Yao Q, Peng D-C (2017). Nitrite oxidizing bacteria (NOB) dominating in nitrifying community in  
650 full-scale biological nutrient removal wastewater treatment plants. *AMB Express* **7**: 25.

651

## 652 **List of Tables and Figures**

653 Table 1. The key operational condition, effluent quality and corresponding relative abundance of

654 AOB and NOB in three major wastewater treatment plants treating domestic waste water (values  
655 are averages and standard error of the mean from three sampling events).

656 Table 2 Operational parameters at different experimental stages of the lab-scale partial nitrification  
657 (PN)/ nitrification (N)-denitrification (DN) sequencing batch reactor.

658 Figure 1 Ammonia oxidizing and nitrite oxidizing bacteria detectable by 16S rRNA gene amplicon  
659 sequencing in three major wastewater treatment plants in Singapore and the lab-scale partial  
660 nitrification/ nitrification-denitrification reactor during different experimental phases (see Table 2 and  
661 Figure 2). The scale on the heat map denotes relative abundance of each taxon in %.

662 Figure 2 Effluent ammonium, nitrate and nitrite concentrations, (B) relative abundance of  
663 detectable ammonia oxidizing bacteria (f\_*Nitrosomonadaceae*) and nitrite oxidizing bacteria  
664 (g\_*Nitrospira*-sublineage I) and the corresponding nitrite:NO<sub>x</sub> ratio, and (C) relative abundance of  
665 all other detectable taxa in the sludge of the lab-scale partial nitrification(PN)/ nitrification(N)-  
666 denitrification(DN) sequencing batch reactor as a function of time. In (C) all detected taxa are  
667 displayed but only the top ten most abundant annotated taxa in all three samples are listed. Dashed  
668 lines indicate changes made to operational conditions summarized in Table 2.

669 Figure 3 Experimentally observed and model-based ammonia oxidising and/or nitrite oxidising  
670 activity at varying dissolved oxygen concentrations in the ammonia oxidising bacteria (AOB)  
671 activity test (first row), nitrite oxidising bacteria (NOB) activity test (second row), and  
672 simultaneous AOB and NOB (third row) activity test with Plant 3 activated sludge and in the AOB  
673 activity test using sludge from the lab-scale reactor (fourth row). Each condition was tested in  
674 triplicate.

675 Figure 4 The effect of dissolved oxygen concentration on the average specific nitrite or ammonia  
676 oxidation rate (NOR or AOR) of activated sludge from Plant 3 in the nitrite oxidising bacteria  
677 (NOB) batch tests, ammonia oxidising bacteria (AOB) batch tests and the concurrent AOB and  
678 NOB batch tests and of sludge from lab-scale reactor in the AOB batch tests.

679 Figure 5 Ammonia oxidising bacteria (probes NSO1225 & NSO190 in green) and nitrite oxidising  
680 bacteria (probe Ntspa662 in red) colonies detected by fluorescence in situ hybridisation (FISH) in  
681 Plant 3 sludge. Boxes indicate microcolonies identified based on threshold described in materials  
682 and methods under further analyses. Ticks on all axes are uniformly distributed at 5  $\mu\text{m}$ . All other  
683 detected bacteria are shown in blue (probes EUB338, EUB338-II and EUB338-III).

684 Figure 6 Physical properties of ammonia oxidising bacteria (AOB) and nitrite oxidising bacteria  
685 (NOB) clusters identified by fluorescence in situ hybridisation (FISH) with an example shown in  
686 Figure 4. Data represent the median with 95% confidence interval. P values are listed for unpaired  
687 nonparametric Mann-Whitney U test. The value for shape denotes the sphericity of the clusters  
688 with the value 1 being round.

689

690



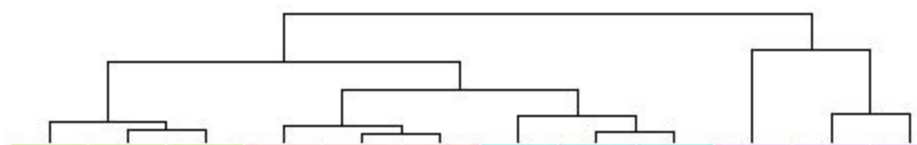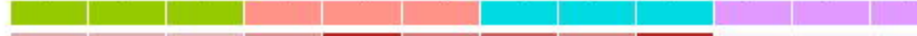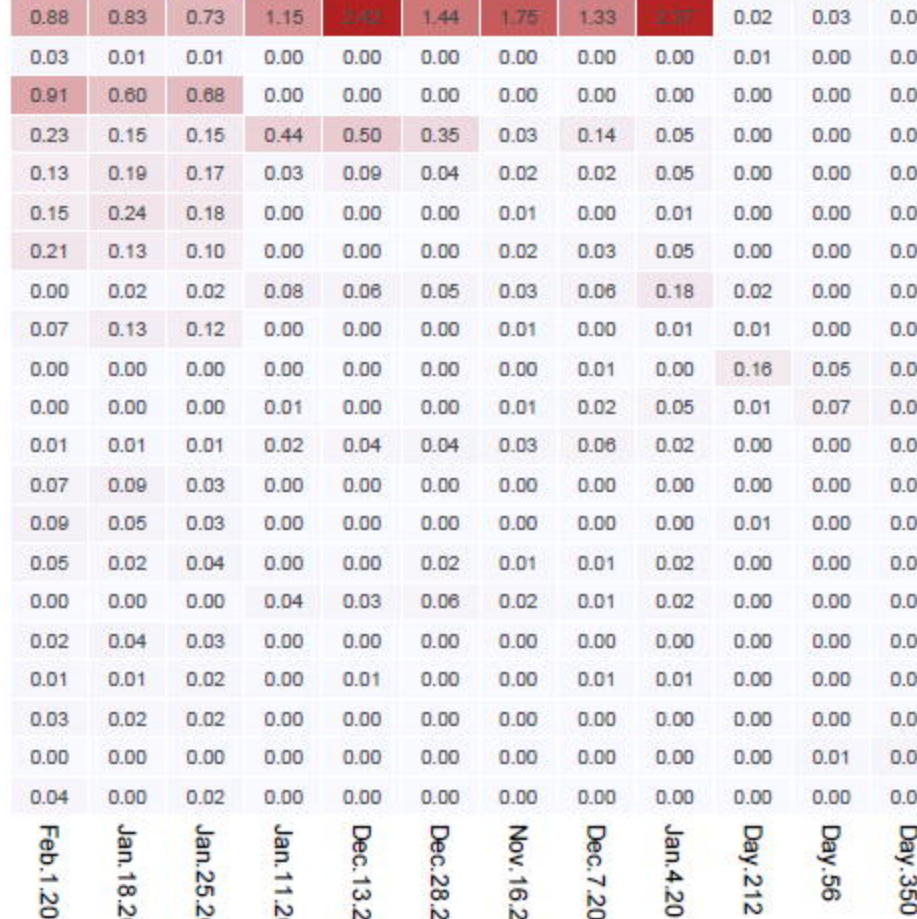

Samples

f\_Nitrospiraceae g\_Nitrospira s\_sublineage I OTU\_32  
 f\_Nitrospiraceae g\_Nitrospira s\_sublineage I OTU\_786  
 f\_Nitrosomonadaceae g\_uncultured s\_OTU\_1019  
 f\_Nitrosomonadaceae g\_Nitrosomonas s\_OTU\_278  
 f\_Nitrosomonadaceae g\_uncultured s\_OTU\_442  
 f\_Nitrosomonadaceae OTU\_648  
 f\_Nitrosomonadaceae g\_Nitrosomonas s\_OTU\_838  
 f\_Nitrosomonadaceae g\_uncultured s\_OTU\_649  
 f\_Nitrosomonadaceae g\_uncultured s\_OTU\_1989  
 f\_Nitrosomonadaceae g\_Nitrosomonas s\_OTU\_240  
 f\_Nitrosomonadaceae g\_Nitrosomonas s\_OTU\_214  
 f\_Nitrosomonadaceae g\_uncultured s\_OTU\_651  
 f\_Nitrosomonadaceae g\_Nitrosomonas s\_OTU\_2328  
 f\_Nitrosomonadaceae g\_Nitrosomonas s\_OTU\_1016  
 f\_Nitrosomonadaceae g\_uncultured s\_OTU\_1728  
 f\_Nitrosomonadaceae g\_A0837 s\_OTU\_575  
 f\_Nitrosomonadaceae g\_A0837 s\_OTU\_2143  
 f\_Nitrosomonadaceae g\_uncultured s\_OTU\_1793  
 f\_Nitrosomonadaceae g\_Nitrosomonas s\_OTU\_3130  
 f\_Nitrosomonadaceae g\_Nitrosomonas s\_OTU\_548  
 f\_Nitrosomonadaceae g\_Nitrosomonas s\_OTU\_3041

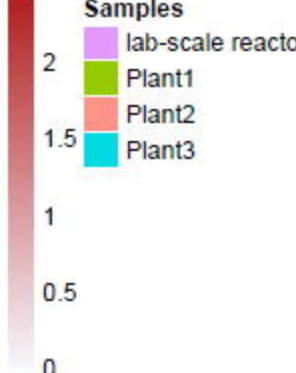

Feb.1.2017  
 Jan.18.2017  
 Jan.25.2017  
 Jan.11.2017  
 Dec.13.2016  
 Dec.28.2016  
 Nov.16.2016  
 Dec.7.2016  
 Jan.4.2017  
 Day.212  
 Day.56  
 Day.350

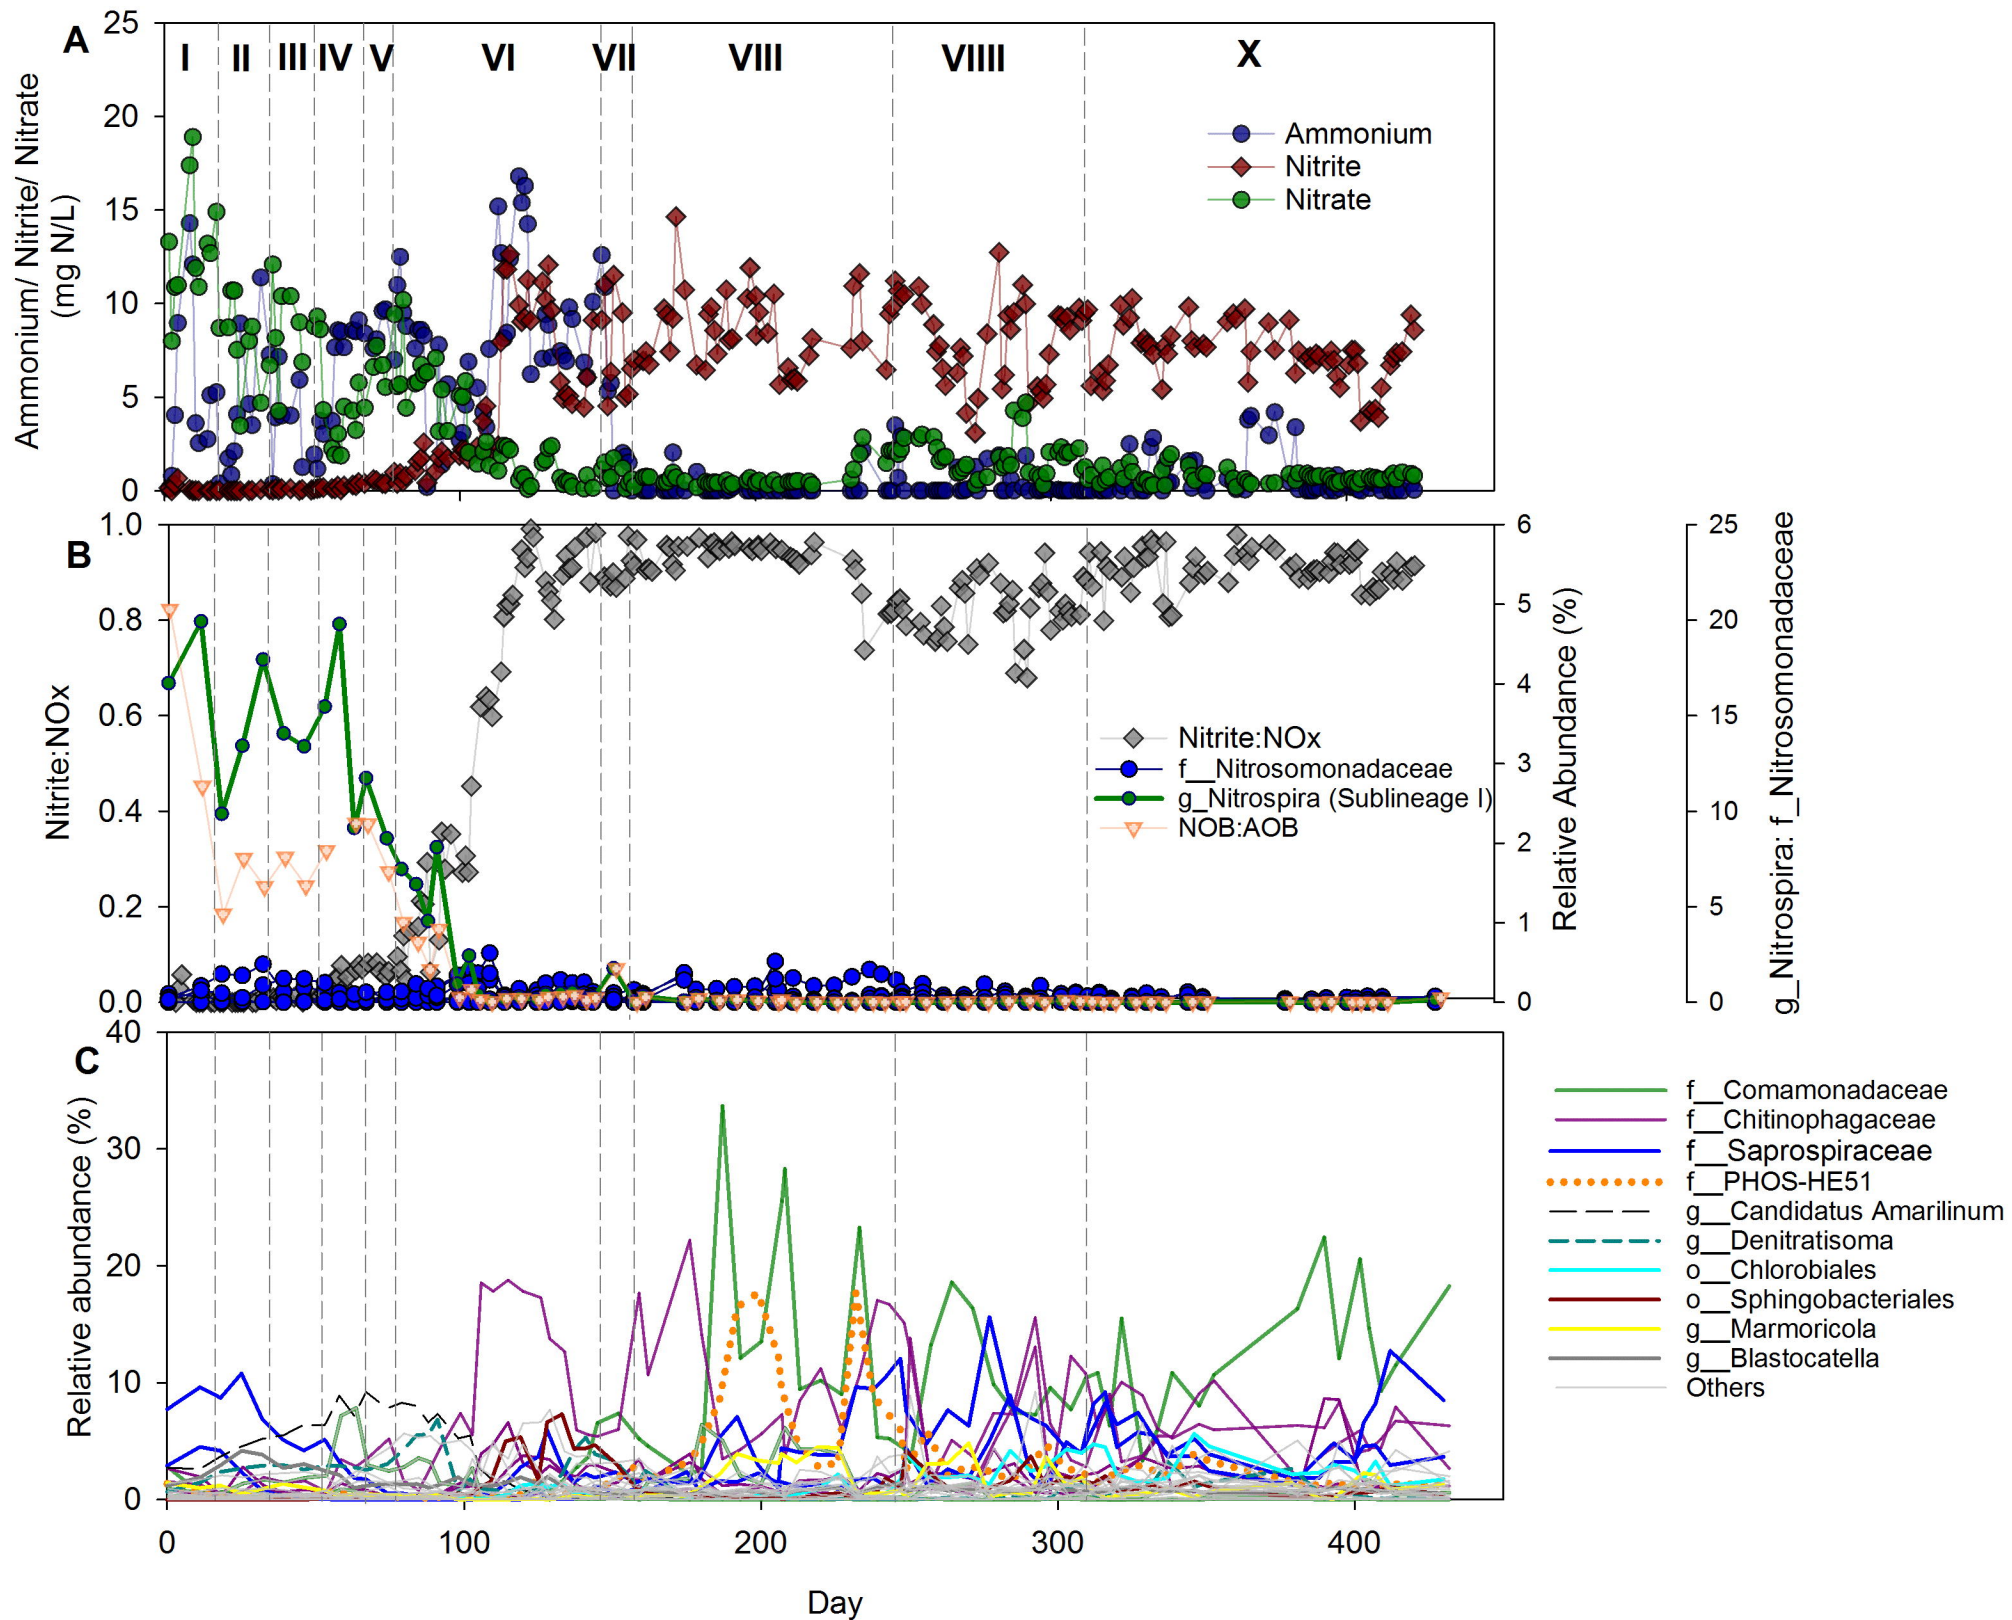



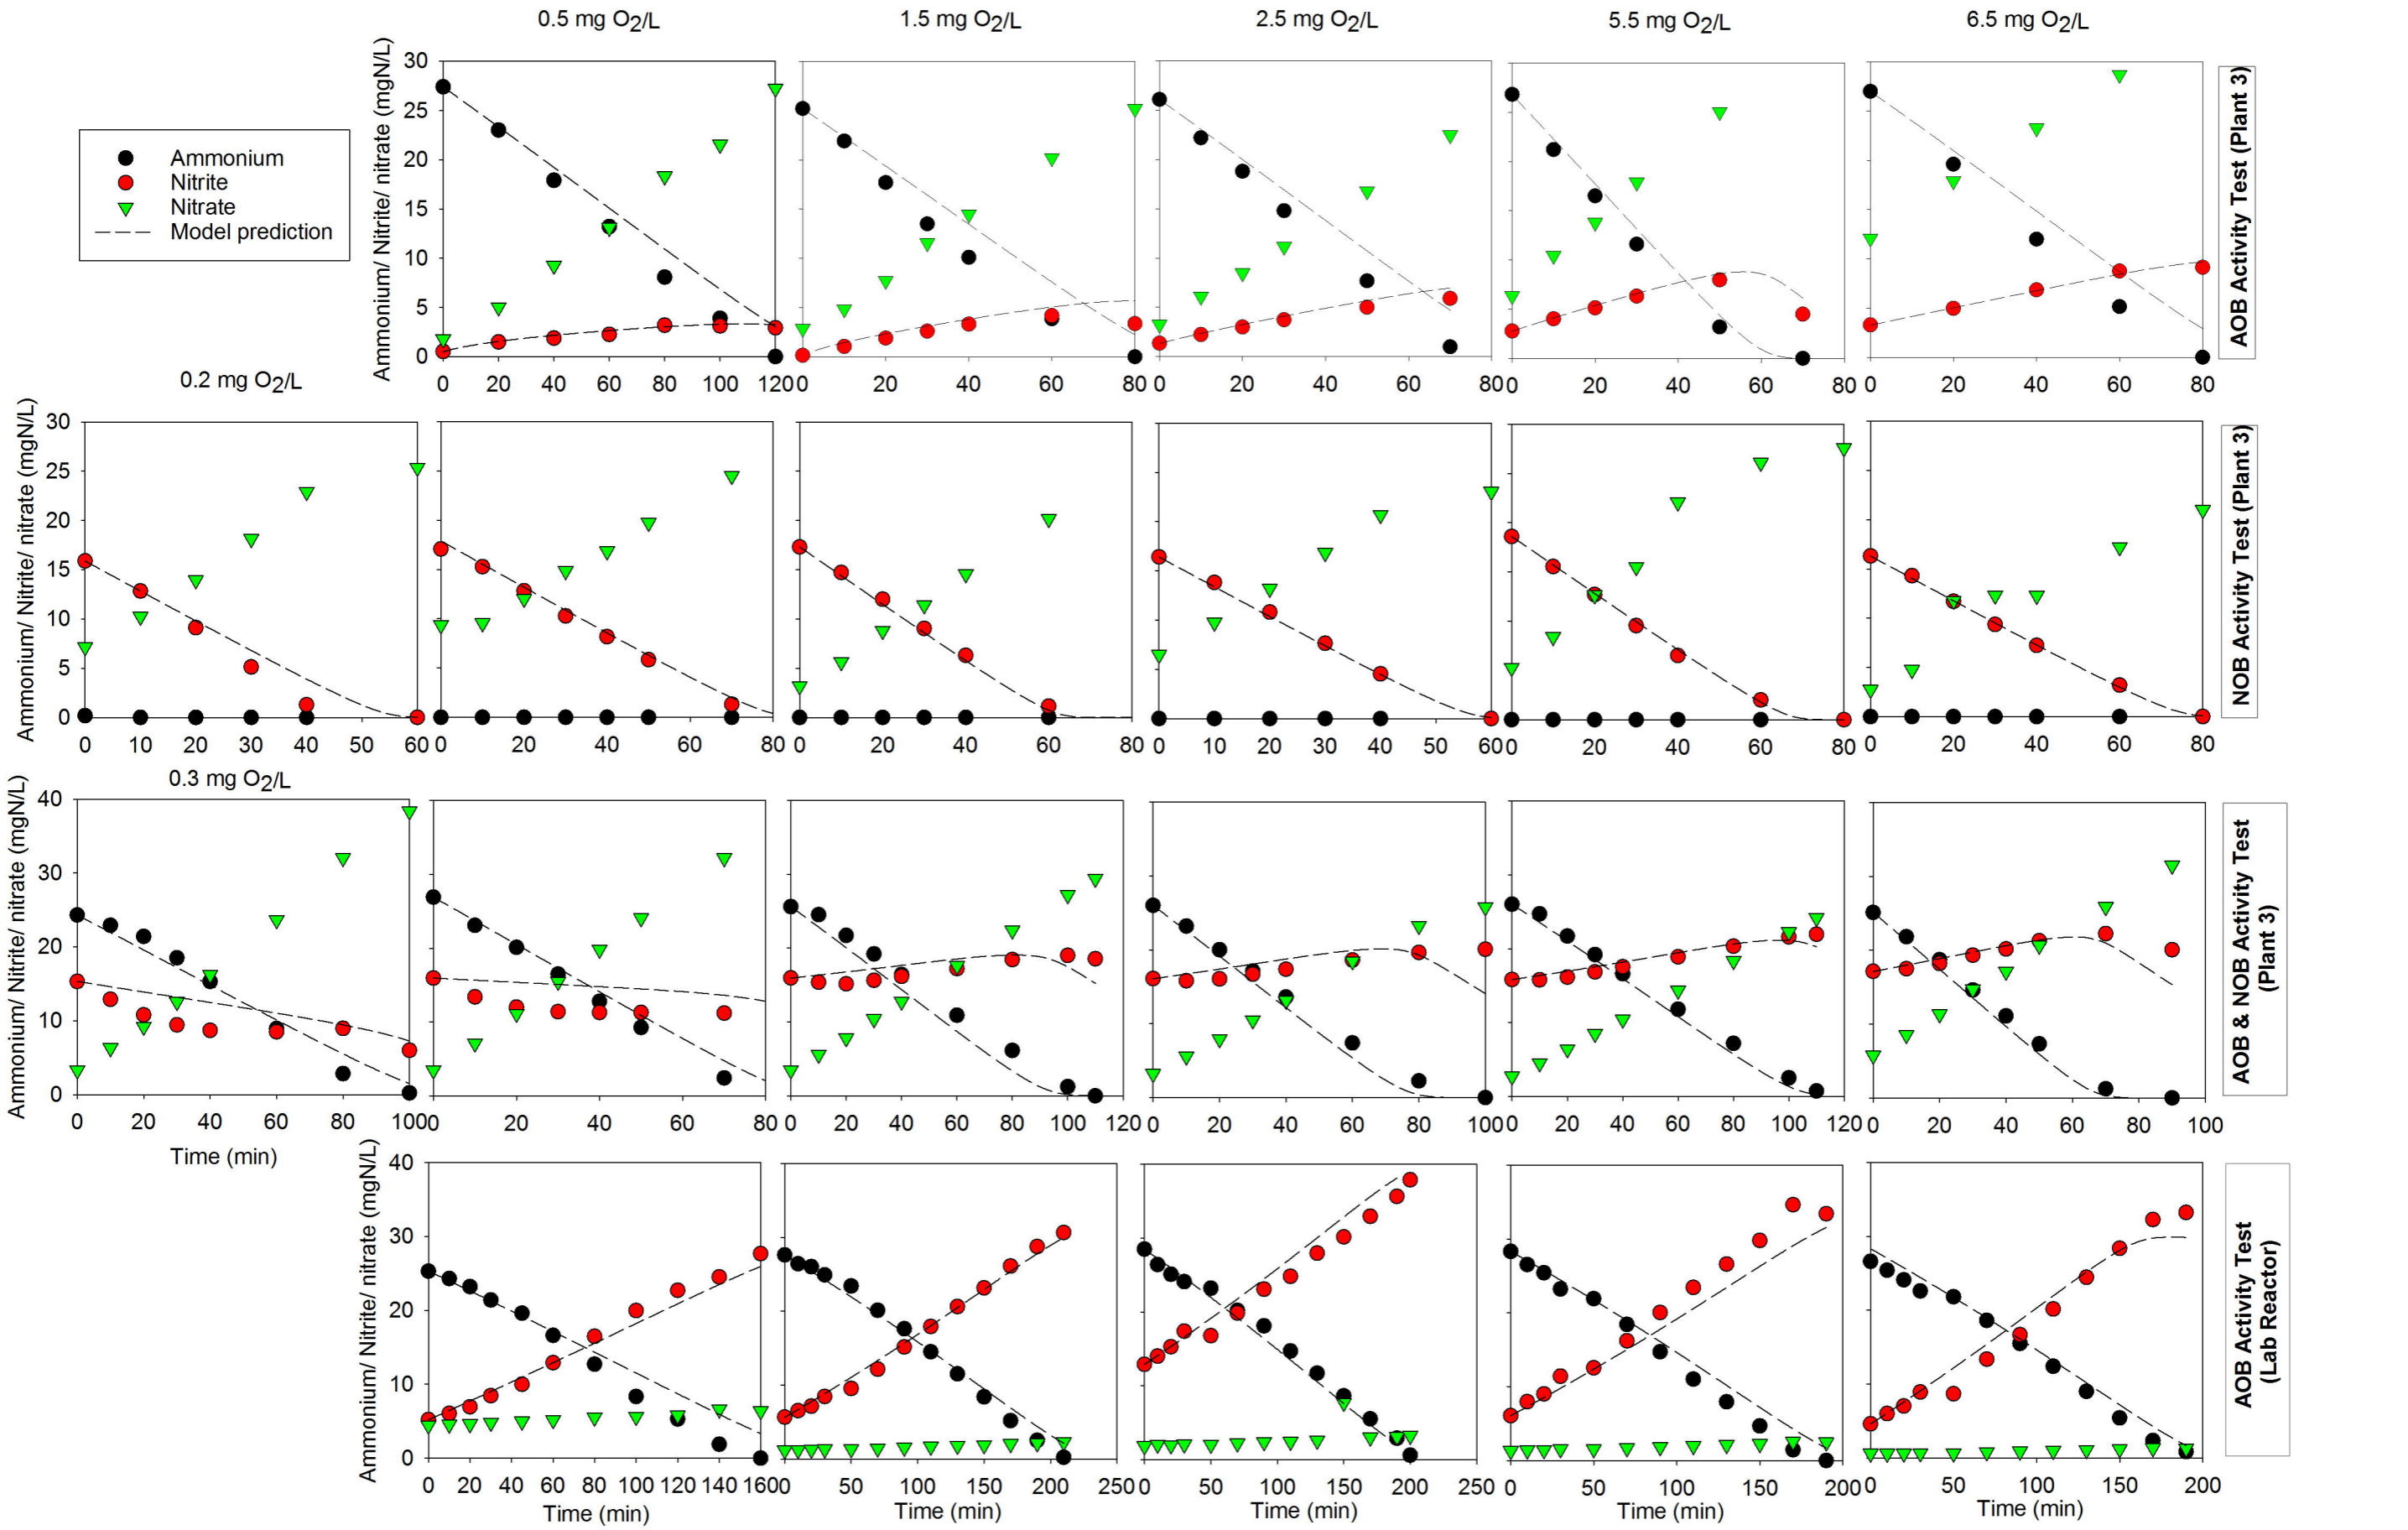

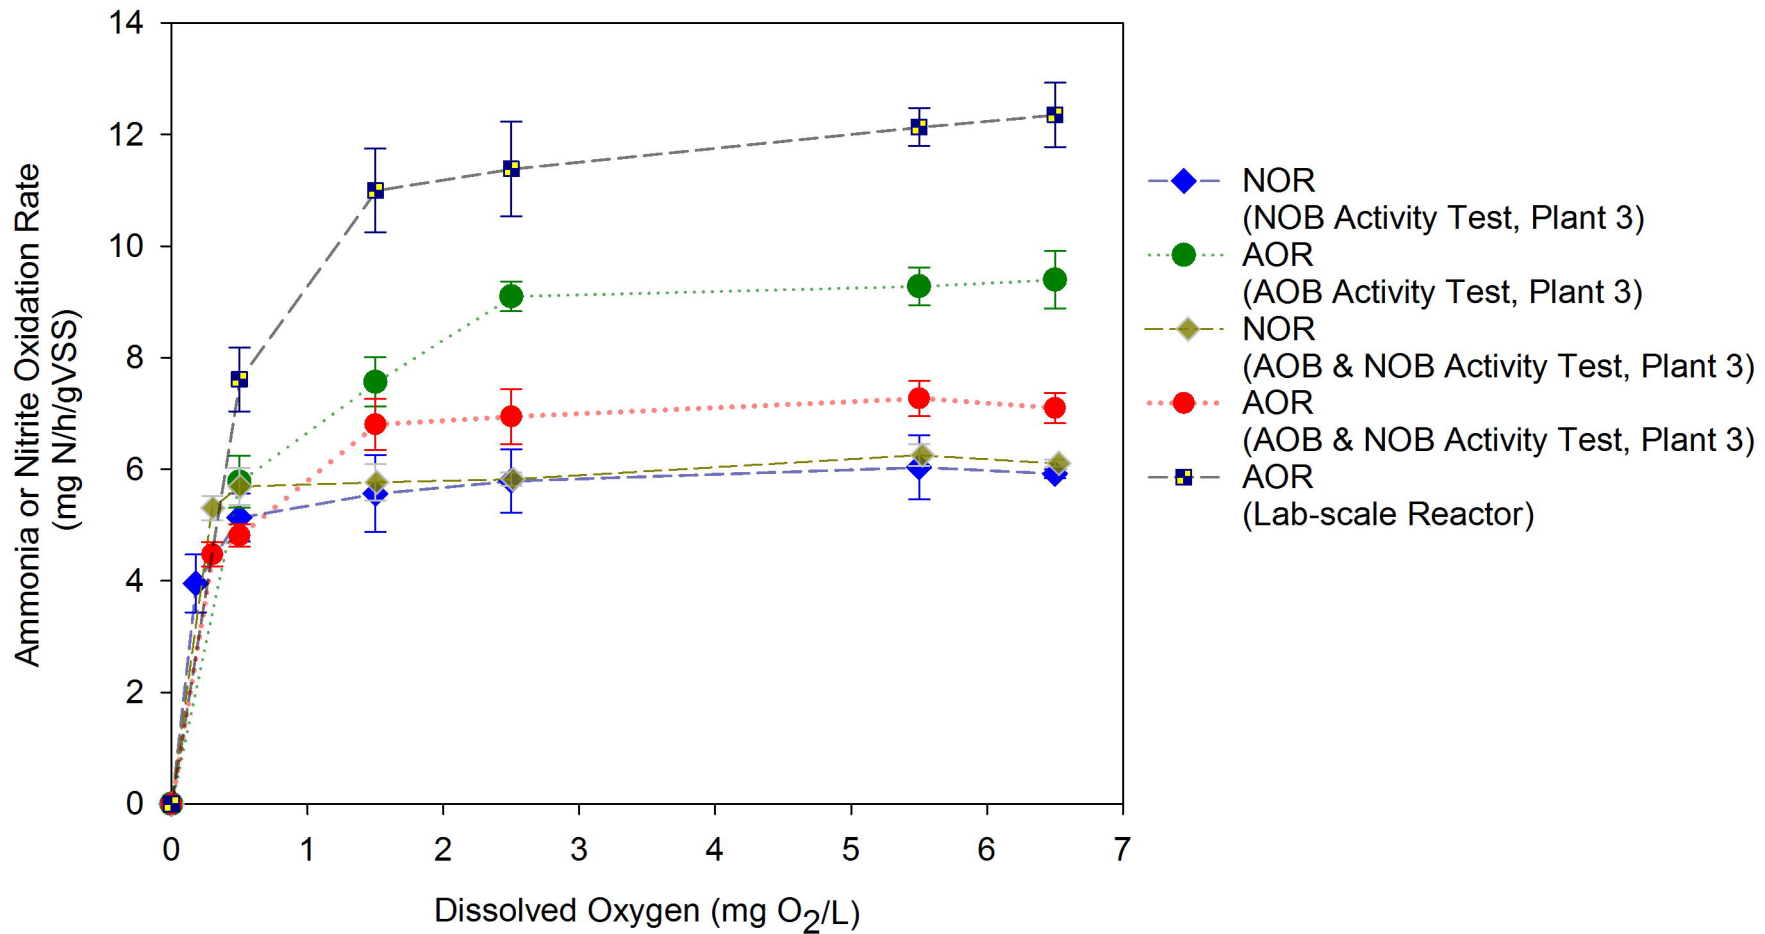



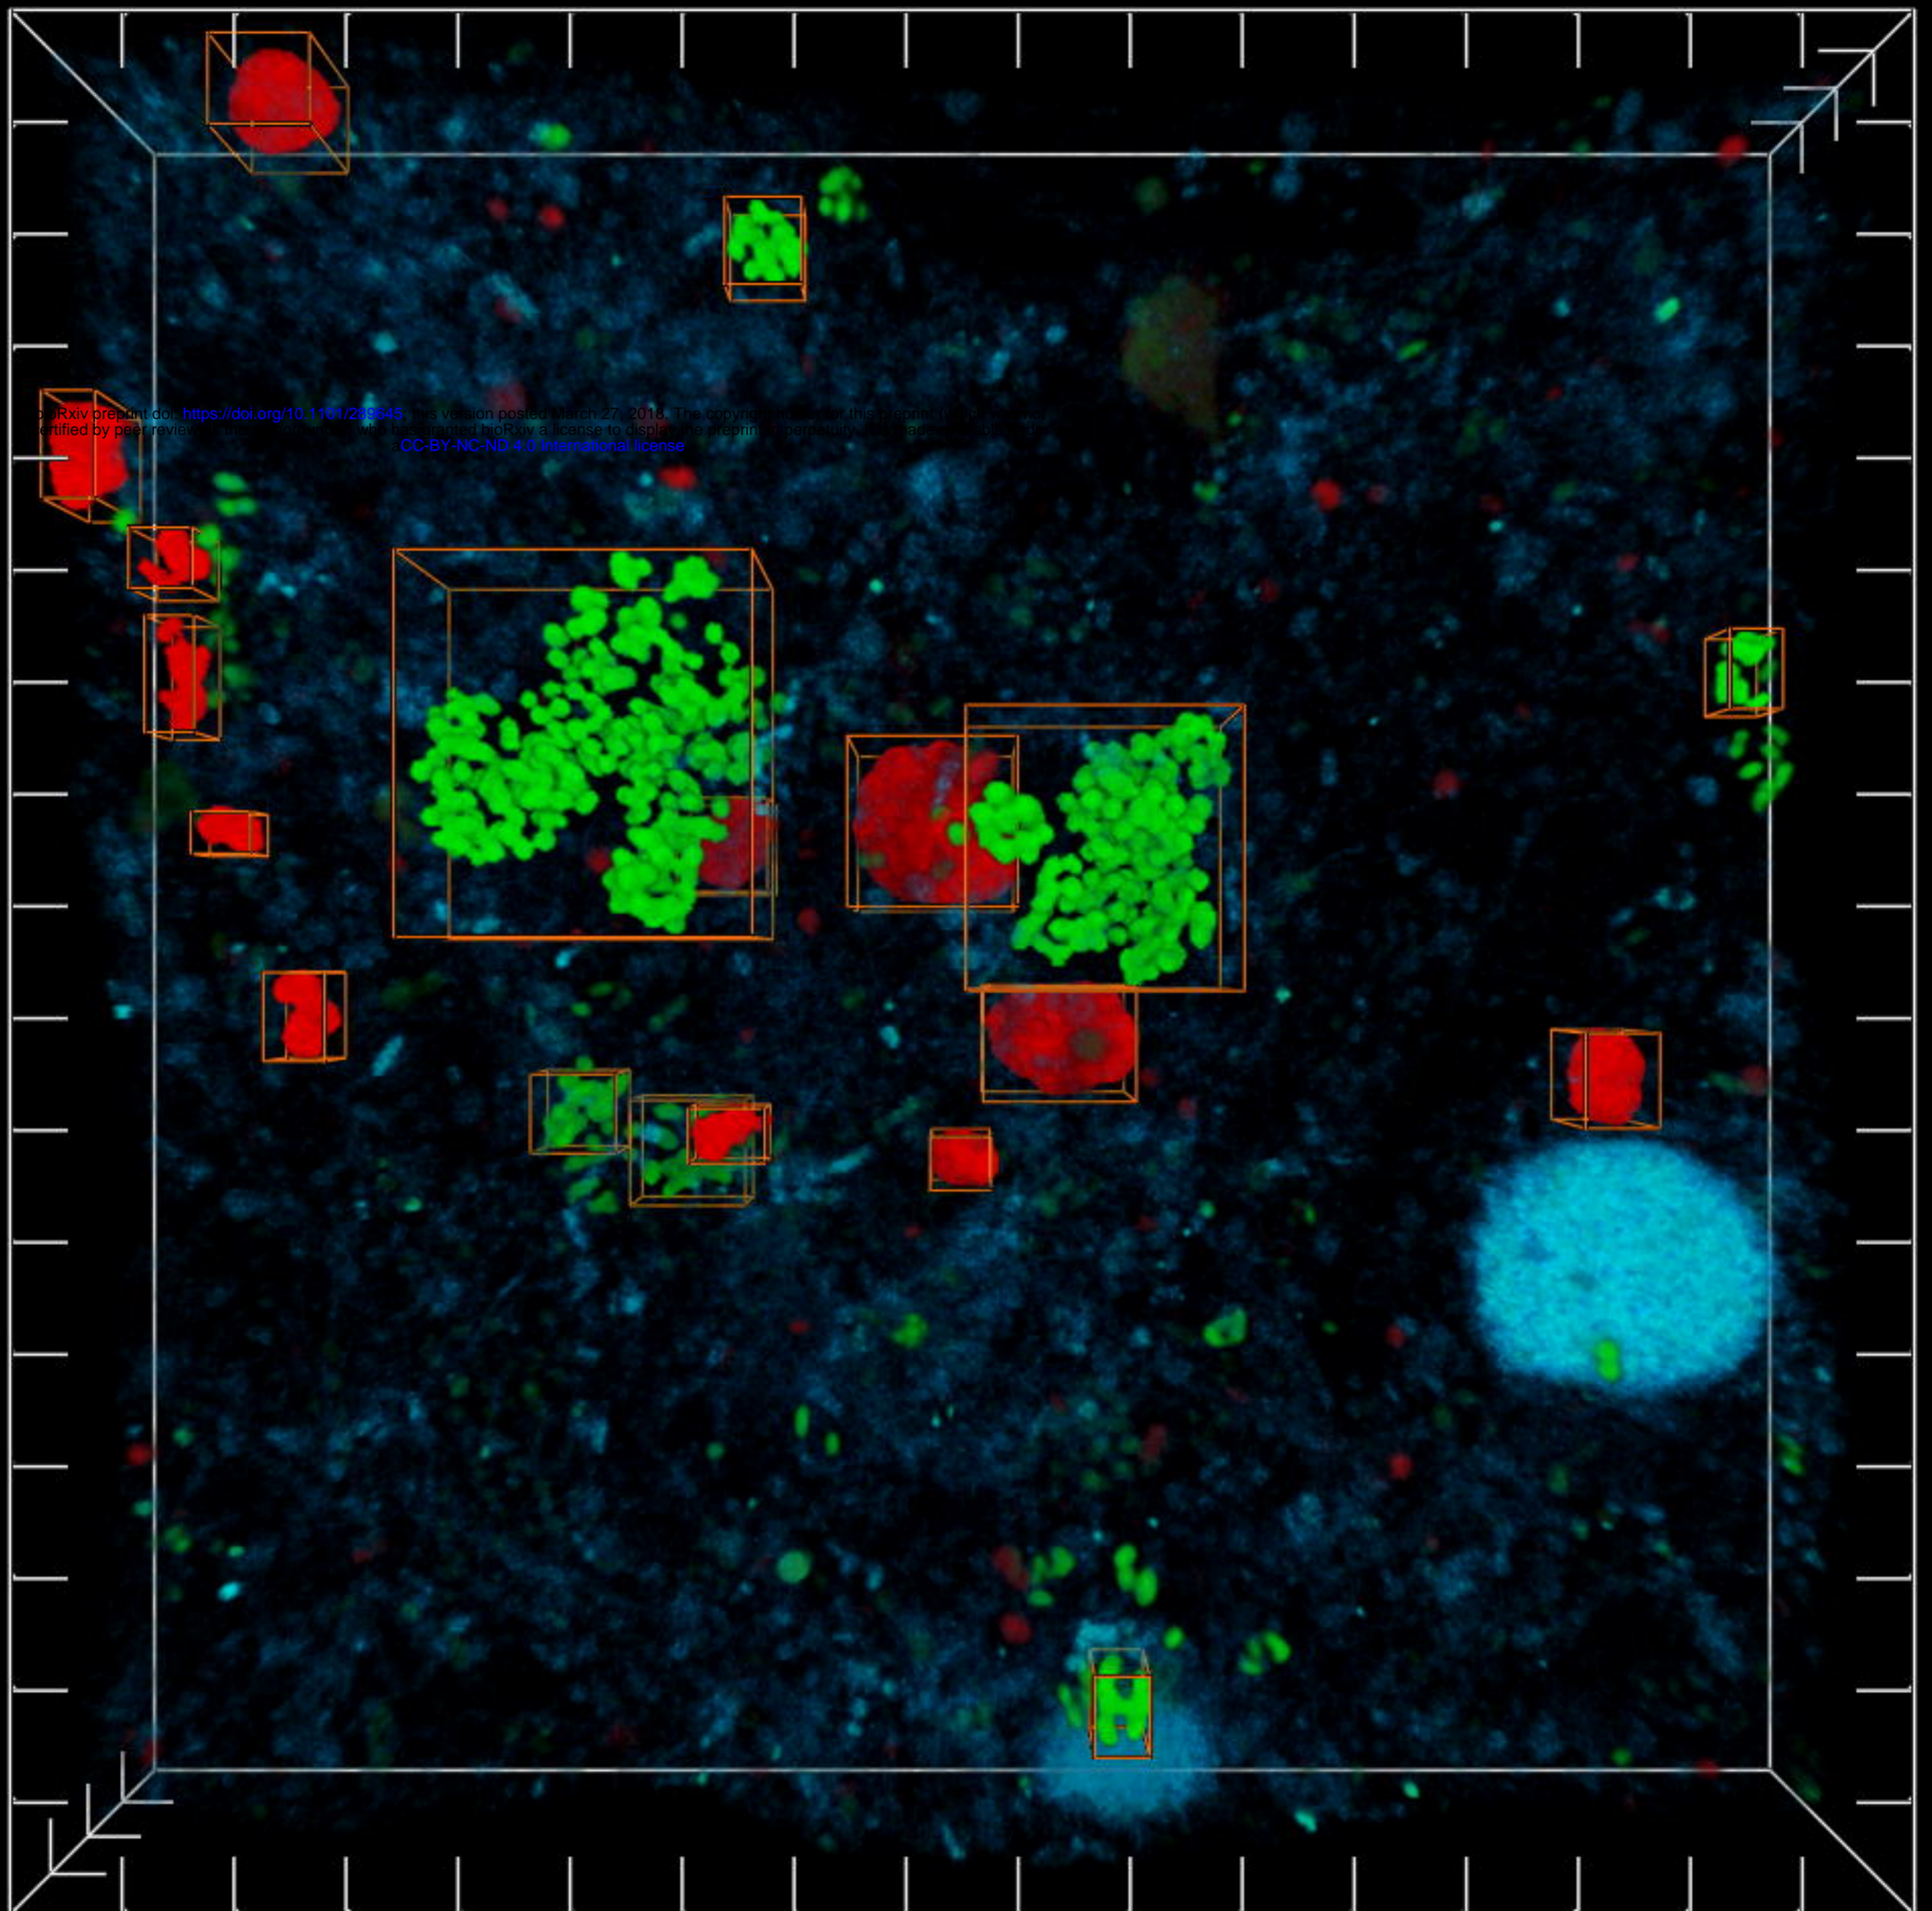

bioRxiv preprint doi: <https://doi.org/10.1101/283645>; this version posted March 27, 2018. The copyright holder for this preprint (which was not certified by peer review) is the author/funder, who has granted bioRxiv a license to display the preprint in perpetuity. It is made available under aCC-BY-NC-ND 4.0 International license.



### Volume

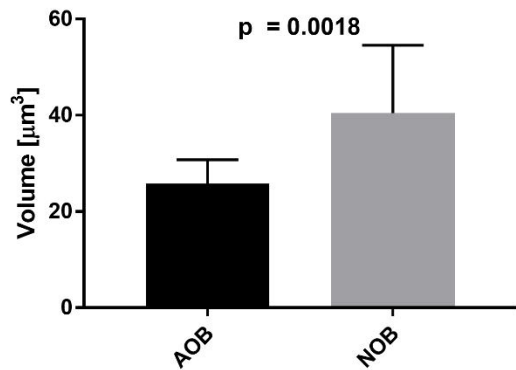

### Surface

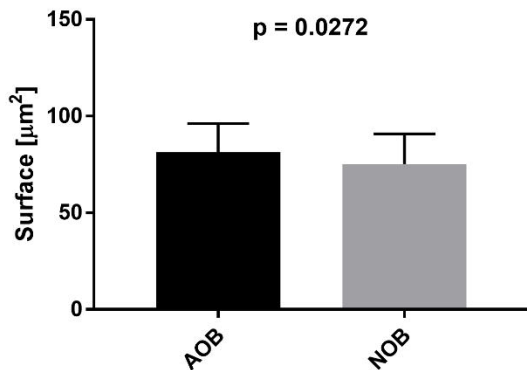

### Surface/volume ratio

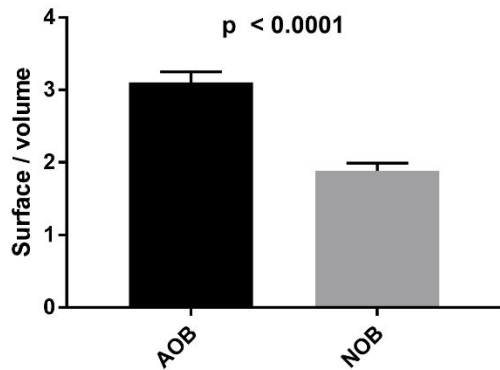

### Shape

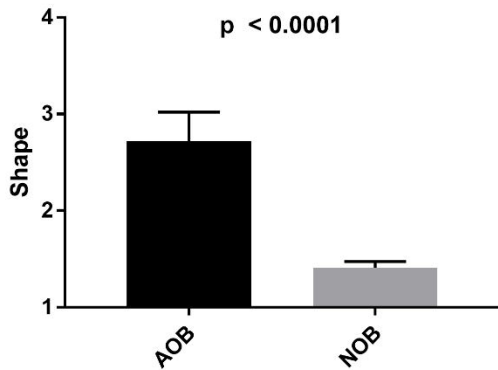

|                                                      | Plant 1                                      | Plant 2                   | Plant 3                  |
|------------------------------------------------------|----------------------------------------------|---------------------------|--------------------------|
| Process configuration                                | Pre-denitrification/Anaerobic / Aerobic/ MBR | Modified Ludzack Ettinger | Anoxic/Oxic Step Feeding |
| Dissolved Oxygen (mg O <sub>2</sub> /L)              | 1.6±0.6                                      | 0.8±0.2                   | 1.2±0.2                  |
| pH                                                   | 7.7-8.3                                      | 6.9-7.7                   | 6.4-7.0                  |
| Solid retention time (day)                           | 15-18                                        | 4-6                       | 4-6                      |
| Effluent ammonium (mg N/L)                           | 0.2±0.2                                      | 3.1±1.5                   | 2.4±1.0                  |
| Effluent nitrate (mg N/L)                            | 8.1±0.8                                      | 7.5±0.9                   | 10.6±8.0                 |
| Effluent nitrite (mg N/L)                            | 0                                            | 0.7±0.2                   | 0.3                      |
| Effluent phosphate (mg P/L)                          | 0.8±0.8                                      | 0                         | 1.6±0.7                  |
| Effluent TCOD (mg/L)                                 | 17±2                                         | 17.9±1.5                  | 11.3±0.9                 |
| Mixed liquor suspended solids (g/L)                  | 3.16±0.07                                    | 2.06±0.14                 | 2.44±0.01                |
| Relative abundance of <i>g_Nitrospira</i> (%)        | 0.83±0.05                                    | 1.67±0.38                 | 1.81±0.30                |
| Relative abundance of <i>f_Nitrosomonadaceae</i> (%) | 1.79±0.12                                    | 0.64±0.05                 | 0.33±0.09                |

| Experimental Phase | Period (day) | pH      | Dissolved Oxygen Set point (mg O <sub>2</sub> /L) | Solid retention time (day) | Aerobic period (min) | Mode of operation | Temperature (°C) |
|--------------------|--------------|---------|---------------------------------------------------|----------------------------|----------------------|-------------------|------------------|
| I                  | 0-16         | 6.6-7.1 | 0.5-1.5                                           | >12 (Not controlled)       | 60                   | PN-DN             | 30.5 ± 0.5       |
| II                 | 17-36        | 6.6-7.1 | 0.4-0.8                                           | >12 (Not controlled)       | 60                   | PN-DN             | 30.5 ± 0.5       |
| III                | 36-45        | 6.6-7.1 | 1.0-1.5                                           | >12 (Not controlled)       | 60                   | PN-DN             | 30.5 ± 0.5       |
| IV                 | 46-66        | 6.4-6.9 | 2.0-2.5                                           | >12 (Not controlled)       | 60                   | PN-DN             | 30.5 ± 0.5       |
| V                  | 67-77        | 6.5-7.0 | 2.0-2.5                                           | >12 (Not controlled)       | 20-25                | PN-DN             | 30.5 ± 0.5       |
| VI                 | 78-149       | 6.5-7.0 | 4.5-5.5                                           | >12 (Not controlled)       | 16-18                | PN-DN             | 30.5 ± 0.5       |
| VII                | 150-160      | 6.1-7.1 | 4.5-5.5                                           | >12 (Not controlled)       | 35-40                | N-DN              | 30.5 ± 0.5       |
| VIII               | 161-244      | 6.1-7.1 | 4.5-5.5                                           | 8                          | 35-40                | N-DN              | 30.5 ± 0.5       |
| VIII               | 245-309      | 6.1-7.1 | 1.0-1.5                                           | 8                          | 45-50                | N-DN              | 30.5 ± 0.5       |
| X                  | 309-402      | 6.1-7.1 | 0.5-1.0                                           | 8                          | 60                   | N-DN              | 30.5 ± 0.5       |
